# Supplementary material
Source: publisher figshare collection journal article supplement (https://diabetesjournals.figshare.com/ndownloader/files/22438835)
Supplement: Supplementary file 1 [file 22438835]

**Supplements**

**Is Type 2 Diabetes Mellitus Causally Associated with Cancer Risk? Evidence from a Two-Sample Mendelian Randomisation Study**

Shuai Yuan, Siddhartha Kar, Paul Carter, Mathew Vithayathil, Amy M. Mason, Stephen Burgess, Susanna C. Larsson

Supplementary Table 1. Information of included studies and consortia

Supplementary Table 2. Cancer diagnosis source in used consortia

Supplementary Table 3. SNPs used as instrumental variable for type 2 diabetes mellitus, fasting glucose and fasting insulin

Supplementary Table 4. SNPs used as instrumental variable for pancreatic cancer

Supplementary Table 5. Characteristics of Mendelian randomization studies of T2DM-related traits and cancer risk

Supplementary Table 6. Power estimation in the analysis of MR associations between type 2 diabetes mellitus and cancer risk

Supplementary Figure 1. Flow chart of systematic review

Supplementary Figure 2. Association of type 2 diabetes with 22-site specific cancers using 295 SNPs at the genome-wide significance level

Supplementary Figure 3. Associations of pancreatic cancer and T2DM risk

Supplementary Figure 4. Associations between type 2 diabetes mellitus and cancers after body mass index adjustment in UK Biobank

Supplementary Figure 5. Associations of fasting glucose and insulin levels with overall cancer risk

Supplementary Figure 6. Association between fasting glucose levels and 22-site specific cancers

Supplementary Figure 7. Association between fasting insulin levels and 22-site specific cancers

Supplementary Figure 8. Meta-analysis of effects of fasting glucose on certain site-specific cancers

Supplementary Figure 9. Meta-analysis of effects of fasting insulin on certain site-specific cancers

**Supplementary Table 1. Information of included studies and consortia**

| **Exposure/Outcome** | **Consortium or cohort study** | **Participants** | **Web source if publicly available** |
| --- | --- | --- | --- |
| Type 2 diabetes mellitus | DIAbetes Genetics Replication And Meta-analysis (DIAGRAM) consortium | 898 130 individuals (74 124 type 2 diabetes cases and 824 006 controls) of European ancestry | <https://www.diagram-consortium.org/> |
| Fasting glucose and fasting insulin levels | Meta-Analyses of Glucose and Insulin-related traits Consortium (MAGIC) | Up to 133 010 individuals of European ancestry in the analysis of fasting glucose and 108 557 individuals of European ancestry in the analysis of fasting insulin | <https://www.magicinvestigators.org/> |
| Breast cancer | The Breast Cancer Association Consortium (BCAC) | 228 951 European-descent individuals, including 122 977 all breast cancer cases (69 501 ER+ and 21 468 ER-) and 105 974 controls | <http://bcac.ccge.medschl.cam.ac.uk/> |
| Pancreatic cancer | Pancreatic Cancer Cohort Consortium (PanScan) and the Pancreatic Cancer Case-Control Consortium (PanC4) | 9040 cancer cases and 12 496 controls of European ancestry | <https://www.ncbi.nlm.nih.gov/projects/gap/cgi-bin/study.cgi?study_id=phs000206.v5.p3> |
| Overall and 22 site-specific cancers a | UK Biobank | 367 643 unrelated European-descent individuals (75 037 cancer cases and 292 606 non-cases) | <https://www.ukbiobank.ac.uk/> |

a The numbers of cases for individual cancer in the UK Biobank are listed in the Manuscript Figure 2.

**Supplementary Table 2. Cancer diagnosis source in used consortia**

| **Genetic consortium** | **Included studies** | **Country** | **Source of cases or study design** |
| --- | --- | --- | --- |
| UK Biobank | UK Biobank | UK | Registry data and self-reported information (validated by interview with a nurse) |
| PanScan and PanC4 | Agricultural Health Study (AHS) | USA | Linkage to state cancer registries. |
|  | The Alpha-Tocopherol, Beta-Carotene Prevention Study (ATBC) | Finland | Linkage to Finnish Cancer registry |
|  | Cancer Prevention Study (CPS-II) | USA | Identified through self-report on biannual questionnaires starting in 1997 or through linkage with the National Death Index. Verified by medical records or linkage to state cancer registries. |
|  | European Prospective Investigation Into Cancer and Nutrition Study (EPIC) | Europe | Cancer registries in participating countries (Denmark, Italy, The Netherlands, Norway, Spain, Sweden and the UK) and through health insurance records, cancer and pathology registries, and active follow- up of study subjects and next of kin (France, Germany, and Greece) |
|  | Health Professionals Follow-up Study (HFPS) | USA | Identified through self-report on biannual questionnaires or through linkage with the National Death Index. Verified by medical records or linkage to state cancer registries. |
|  | The Melbourne Collaborative Cohort Study (MCCS) | Australia | Linkage to national cancer registries. |
|  | Multiethnic Cohort Study of Diet and Health (MEC) | USA | Linkage to the Hawaii Tumor Registry, the Cancer Surveillance Program of Los Angeles County, and the California State Cancer Registry |
|  | Nurse's Health Study (NHS) | USA | Identified through self-report on biannual questionnaires or through linkage with the National Death Index. Verified by medical records or linkage to state cancer registries. |
|  | Physicians Health Study (PHS) | USA | Identified through self-report on biannual questionnaires or through linkage with the National Death Index. Verified by medical records or linkage to state cancer registries. |
|  | Prostate, Lung, Colorectal, Ovarian Cancer Screening Trial (PLCO) | USA | Self-report through annual questionnaires. Confirmed by pathology reports and medical records. |
|  | Selenium and Vitamin E Cancer Prevention Trial (SELECT) | USA | Self-report through bi-annual clinic visits during the trial. Confirmed by pathology reports. |
|  | Vitamins and Lifestyle Study (VITAL) | USA | Linkage to the western Washington state SEER registry |
|  | Women’s Health Initiative (WHI) | USA | Self-report through semi-annual clinic visits or annual |
|  | Give Us a Clue to Cancer and Heart Disease Study (CLUEII) | USA | Washington County Cancer Registry, Maryland State Cancer Registry |
|  | The New York University Women’s Health Study (NYU- WHS) | USA | Self-report through questionnaires every 2-4 years, confirmed by medical and pathology records; and linkages to tumor registries of NY, NJ and Florida and NDI |
|  | Prostate, Lung, Colorectal, Ovarian Cancer Screening Trial (PLCO) | USA | Self-report through annual questionnaires. Confirmed by pathology reports and medical records. |
|  | Women’s Health Initiative (WHI) | USA | Self-report through semi-annual clinic visits or annual contact. Verified through medical records. |
|  | Womens' Heath Study (WHS) | USA | Self report or death follow-up. |
|  | IARC | France | Academic hospitals |
|  | Johns Hopkins Hospital | USA | Clinic |
|  | Mayo Clinic | USA | Clinic |
|  | MD Anderson | USA | Hospital |
|  | Memorial Sloan Kettering | USA | Clinic |
|  | Toronto | Canada | Population-based cancer registry |
|  | Queensland | USA | Population-based hospitals & cancer registry |
|  | UCSF | USA | Two UCSF Clinics |
|  | YALE | USA | Population-based hospitals & cancer registry |
|  | PANDoRA | Europe | Clinic based caes from 15 basic and/or clinical research groups, across six European countries |
|  | Cancer and Leukemia Group B (CALGB) study 80303 | USA | Phase III multi- institution clinical trial of bevacizumab and gemcitabine. Cases histologically confirmed. Cancer not amenable to curative surgery. |
|  | PLCO | USA | Self-report through annual questionnaires. Confirmed by pathology reports and medical records. |
|  | Carotene and Retinol Efficacy Trial (CARET) and samples from studies with DNA that was inadequate for GWAS* | USA | Self-report to the Coordinating Center at the Hutchinson Cancer Center. Verified through pathology reports and medical records. |
| BCAC | The Two Sister Study | USA | Cases from sister-matched case-control study |
|  | Australian Breast Cancer Family Study | Australia | Population-based case-control study |
|  | Amsterdam Breast Cancer Study | Netherlands | Hospital-based consecutive cases |
|  | Australian Breast Cancer Tissue Bank | Australia | Hospital based multi-site newly diagnosed breast cancer cases |
|  | Asia Cancer Program | Thailand | Hospital based case-control study |
|  | Bavarian Breast Cancer Cases and Controls | Germany | Hospital based cases |
|  | British Breast Cancer Study | UK | Cancer registry and National Cancer Research network (NCRN) based cases |
|  | Breast Cancer Employment and Environment Study | Australia | Population-based case-control study |
|  | New York Breast Cancer Family Registry | USA | Clinic-based recruitment of families; family-based cohort |
|  | Philadelphia Breast Cancer Family Registry | USA | Clinic-based registry |
|  | Utah Breast Cancer Family Registry | USA | Clinic-based recruitment of non- BRCA1/2 familial breast cancer cases |
|  | Breast Cancer in Northern Israel Study | Israel | Population-based case-control study |
|  | Breast Oncology Galicia Network | Spain | Population-based case-control study |
|  | Breast Cancer Study of the University of Heidelberg | Germany | Hospital based cases |
|  | Canadian Breast Cancer Study | Canada | Population-based case-control study |
|  | Crete Cancer Genetics Program | Greece | Hospital-based case-control study |
|  | CECILE Breast Cancer Study | France | Population-based case-control study |
|  | Copenhagen General Population Study | Denmark | Population-based case-control study |
|  | Cancer Prevention Study-II Nutrition Cohort | USA | Nested case-control study |
|  | California Teachers Study | USA | Prospective cohort study: nested case- control |
|  | DietCompLyf Breast Cancer Survival Study | UK | Multi-centre prospective case study |
|  | European Prospective | Multiple | Nested case-control study within |
|  | Investigation Into Cancer and Nutrition |  | prospective cohort |
|  | ESTHER Breast Cancer Study | Germany | Population-based case-control study |
|  | German Consortium for Hereditary Breast & Ovarian Cancer | Germany | Clinic-based familial case-control study |
|  | Gene Environment Interaction and Breast Cancer in Germany | Germany | Population-based case-control study |
|  | Randomized phase II trial investigating the addition of carboplatin to neoadjuvant therapy for triple-negative and HER2-positive early breast cancer | Germany | Multicenter, prospective, randomized, open-label phase II study |
|  | Genetic Epidemiology Study of Breast Cancer by Age 50 | Germany | Population-based case-control study of women <50 years |
|  | Hannover Breast Cancer Study | Germany | Hospital-based case-control study |
|  | Hospital Clinico San Carlos | Spain | Population-based case study of priori sporadic breast cancer cases |
|  | Helsinki Breast Cancer Study | Finland | Hospital-based case-control study, plus additional familial cases |
|  | Hospital-based Epidemiologic Research Program at Aichi Cancer Center | Japan | Hospital-based case-control study |
|  | Hong Kong Breast Cancer Study | China | Hospital-based case-control study |
|  | Hannover-Minsk Breast Cancer Study | Belarus | Hospital based cases |
|  | Hannover-Ufa Breast Cancer Study | Russia | Population and hospital-based cases; geographically matched controls |
|  | Karolinska Breast Cancer Study | Sweden | Population and hospital-based cases; geographically matched controls |
|  | Karolinska Mammography Project for Risk Prediction of Breast Cancer | Sweden | Registry data |
|  | Kuopio Breast Cancer Project | Finland | Clinic-based cases |
|  | Korean Hereditary Breast Cancer Study | Korea | Population-based Case-Control study |
|  | Leuven Multidisciplinary Breast Centre | Belgium | Hospital-based case-control study |
|  | Macedonian Breast Cancer Study | Macedonia | Hospital-based case-control study |
|  | Mammary Carcinoma Risk Factor Investigation | Germany | Population-based case-control study |
|  | Milan Breast Cancer Study Group | Italy | Clinic-based recruitment of familial/early onset breast cancer cases |
|  | Mayo Clinic Breast Cancer Study | USA | Hospital-based case-control study |
|  | Melbourne Collaborative Cohort Study | Australia | Population-based prospective cohort study |
|  | Multi-ethnic Cohort | USA | Nested case-control study within prospective cohort |
|  | Melanoma Inquiry of Southern Sweden | Sweden | Nested case-control study within population-based prospective cohort study |
|  | Mayo Mammography Health Study | USA | Nested case-control study within prospective cohort |
|  | Montreal Gene-Environment Breast Cancer Study | Canada | Population-based case-control study |
|  | Malaysian Breast Cancer Genetic Study | Malaysia | Hospital-based case-control study |
|  | Norwegian Breast Cancer Study | Norway | Hospital-based case-control study |
|  | Nashville Breast Health Study | USA | Population-based case-control study |
|  | Nagano Breast Cancer Study | Japan | Hospital-based case-control study |
|  | Northern California Breast Cancer Family Registry | USA | Population-based familial case-contros study |
|  | Nurses Health Study | USA | Nested case-control study within population-based cohort |
|  | Nurses Health Study 2 | USA | Nested case-control study within population-based cohort |
|  | Ontario Familial Breast Cancer Registry | Canada | Population-based familial case-control study |
|  | Leiden University Medical Centre Breast Cancer Study | Netherlands | Hospital based case-control study |
|  | NCI Polish Breast Cancer Study | Poland | Population-based case-control study |
|  | The Prostate, Lung, Colorectal and Ovarian (PLCO) Cancer Screening Trial | USA | Nested case-control study within population-based cohort |
|  | Prospective Study of Outcomes in Sporadic Versus Hereditary Breast Cancer | UK | Case series |
|  | Evaluation of Predictive Factors regarding the Effectivity of Aromatase Inhibitor Therapy | Germany | Multicenter, prospective, randomized, open-label phase IV study |
|  | Rotterdam Breast Cancer Study | Netherlands | Hospital based case-control study |
|  | Shanghai Breast Cancer Genetic Study | China | Population-based case-control study, cohort study |
|  | Study of Epidemiology and Risk factors in Cancer Heredity | UK | Population-based case-control study |
|  | Seoul Breast Cancer Study | Korea | Hospital-based case-control study |
|  | Singapore Breast Cancer Cohort | Singapore | Hospital based breast cancer cohort and population based controls |
|  | The Sister Study | USA | Case-cohort nested in prospective cohort of women with a sister-history of breast cancer |
|  | Städtisches Klinikum Karlsruhe Deutsches Krebsforschungszentrum Study | Germany | Hospital-based case series |
|  | Swedish Mammography Cohort | Sweden | Nested case control study within population-based cohort |
|  | Simultaneous Study of Gemcitabine-Docetaxel Combination adjuvant treatment | Germany | Multicenter, prospective, randomized, open-label phase III study |
|  | Simultaneous Study of Docetaxel Based Anthracycline Free Adjuvant Treatment Evaluation | Germany | Multicenter, prospective, randomized, open-label phase III study |
|  | IHCC-Szczecin Breast Cancer Study | Poland | Hospital based case-control study |
|  | Triple-negative Breast Cancer Consortium | USA/Germny | Multiple case series |
|  | Taiwanese Breast Cancer Study | Taiwan | Hospital-based case-control study |
|  | UCI Breast Cancer Study | USA | Population-based case-control study |
|  | UK Breakthrough Generations Study | UK | Prospective cohort study: nested case– control study of incident and prevalent cases from within the cohort |
|  | UK Ovarian Cancer Population Study | UK | Apparently health women from Ovarian Cancer Screening Trial (UKCTOCS) |
|  | Women's Health Initiative | USA | Nested case-control study with population-based cohort |

**Supplementary Table 3. SNPs used as instrumental variable for type 2 diabetes mellitus, fasting glucose and fasting insulin**

| **Trait** | **Nearby gene** | **Chr** | **rsID** | **EAF** | **EA** | **NEA** | **Beta a** | **SE** | **P value b** |
| --- | --- | --- | --- | --- | --- | --- | --- | --- | --- |
| T2D | *FAM63A* | 1 | rs10305745 | 0.01 | A | G | 0.247 | 0.054 | 4.40E-06 |
| T2D | *PTGFRN* | 1 | rs1127215 | 0.58 | C | T | 0.049 | 0.005 | 1.60E-13 |
| T2D | *PROX1* | 1 | rs114526150 | 0.02 | G | T | 0.113 | 0.023 | 4.20E-07 |
| T2D | *DSTYK* | 1 | rs12048743 | 0.44 | G | C | 0.039 | 0.005 | 3.50E-09 |
| T2D | *PATJ* | 1 | rs12140153 | 0.91 | G | T | 0.068 | 0.012 | 1.30E-08 |
| T2D | *PATJ* | 1 | rs12140153 | 0.91 | G | T | 0.068 | 0.012 | 1.30E-08 |
| T2D | *FAM63A* | 1 | rs145904381 | 0.99 | T | C | 0.174 | 0.030 | 2.60E-08 |
| T2D | *NOTCH2* | 1 | rs1493694 | 0.11 | T | C | 0.086 | 0.009 | 2.70E-16 |
| T2D | *DENND2C* | 1 | rs184660829 | 0.00 | C | T | 2.086 | 0.375 | 2.50E-08 |
| T2D | *LYPLAL1* | 1 | rs2820446 | 0.71 | C | G | 0.058 | 0.007 | 3.30E-16 |
| T2D | *GNG4* | 1 | rs291367 | 0.63 | G | A | 0.039 | 0.007 | 4.70E-10 |
| T2D | *PROX1* | 1 | rs340874 | 0.56 | C | T | 0.068 | 0.007 | 1.60E-22 |
| T2D | *ABCB10* | 1 | rs348330 | 0.36 | G | A | 0.049 | 0.007 | 2.70E-14 |
| T2D | *MACF1* | 1 | rs3768321 | 0.20 | T | G | 0.086 | 0.007 | 2.60E-26 |
| T2D | *SEC16B* | 1 | rs539515 | 0.20 | C | A | 0.049 | 0.007 | 1.60E-10 |
| T2D | *SEC16B* | 1 | rs539515 | 0.20 | C | A | 0.049 | 0.007 | 1.60E-10 |
| T2D | *LYPLAL1* | 1 | rs553014999 | 0.00 | C | T | 0.642 | 0.144 | 7.70E-06 |
| T2D | *FAF1* | 1 | rs58432198 | 0.88 | C | T | 0.068 | 0.010 | 2.10E-10 |
| T2D | *PROX1* | 1 | rs79687284 | 0.03 | C | G | 0.148 | 0.020 | 2.60E-16 |
| T2D | *SRGAP2* | 1 | rs9430095 | 0.49 | C | G | 0.039 | 0.007 | 1.90E-08 |
| T2D | *BNIPL* | 2 | rs10193538 | 0.61 | T | G | 0.039 | 0.007 | 8.90E-09 |
| T2D | *GRB14/COBLL1* | 2 | rs10195252 | 0.59 | T | C | 0.068 | 0.005 | 6.00E-25 |
| T2D | *CRYBA2* | 2 | rs113414093 | 0.05 | A | G | 0.113 | 0.020 | 6.60E-09 |
| T2D | *FAM49A* | 2 | rs11680058 | 0.86 | A | G | 0.058 | 0.010 | 1.40E-08 |
| T2D | *GLI2* | 2 | rs11688682 | 0.73 | G | C | 0.049 | 0.007 | 4.20E-09 |
| T2D | *GLI2* | 2 | rs11688931 | 0.85 | C | G | 0.039 | 0.010 | 8.20E-06 |
| T2D | *GCKR* | 2 | rs1260326 | 0.61 | C | T | 0.068 | 0.005 | 6.50E-25 |
| T2D | *GCKR* | 2 | rs1260326 | 0.61 | C | T | 0.068 | 0.005 | 6.50E-25 |
| T2D | *GRB14/COBLL1* | 2 | rs13024606 | 0.05 | T | C | 0.086 | 0.016 | 1.70E-08 |
| T2D | *CYTIP* | 2 | rs13426680 | 0.94 | A | G | 0.086 | 0.012 | 6.70E-10 |
| T2D | *DTNB* | 2 | rs17802463 | 0.73 | G | T | 0.039 | 0.005 | 2.90E-08 |
| T2D | *CEP68* | 2 | rs2028150 | 0.60 | C | G | 0.049 | 0.007 | 2.30E-12 |
| T2D | *CEP68* | 2 | rs2052261 | 0.30 | G | A | 0.068 | 0.012 | 2.50E-06 |
| T2D | *CEP68* | 2 | rs2249105 | 0.63 | A | G | 0.095 | 0.012 | 2.20E-14 |
| T2D | *BCL11A* | 2 | rs243024 | 0.46 | A | G | 0.058 | 0.005 | 2.50E-20 |
| T2D | *THADA* | 2 | rs28525376 | 0.42 | G | T | 0.030 | 0.005 | 2.70E-06 |
| T2D | *IRS1* | 2 | rs2972144 | 0.64 | G | A | 0.095 | 0.007 | 2.10E-46 |
| T2D | *TMEM18* | 2 | rs35913461 | 0.83 | C | T | 0.058 | 0.010 | 1.60E-11 |
| T2D | *PABPC1P2* | 2 | rs35999103 | 0.16 | T | C | 0.049 | 0.010 | 9.70E-09 |
| T2D | *RBMS1* | 2 | rs3772071 | 0.71 | T | C | 0.049 | 0.007 | 1.20E-11 |
| T2D | *DDX18* | 2 | rs562386202 | 0.00 | G | A | 1.163 | 0.213 | 4.20E-08 |
| T2D | *TMEM18* | 2 | rs62107261 | 0.95 | T | C | 0.113 | 0.016 | 3.80E-12 |
| T2D | *BNIPL* | 2 | rs6545714 | 0.39 | G | A | 0.039 | 0.007 | 8.90E-09 |
| T2D | *GLI2* | 2 | rs66477705 | 0.97 | T | C | 0.086 | 0.019 | 2.60E-06 |
| T2D | *THADA* | 2 | rs6708643 | 0.50 | A | G | 0.039 | 0.007 | 3.90E-08 |
| T2D | *TMEM127* | 2 | rs79046683 | 0.00 | T | G | 0.850 | 0.154 | 3.00E-08 |
| T2D | *THADA* | 2 | rs80147536 | 0.90 | A | T | 0.122 | 0.011 | 2.70E-29 |
| T2D | *ADCY5* | 3 | rs11708067 | 0.77 | A | G | 0.086 | 0.007 | 5.20E-32 |
| T2D | *PPARG* | 3 | rs11709077 | 0.88 | G | A | 0.131 | 0.011 | 1.80E-36 |
| T2D | *IGF2BP2* | 3 | rs11717959 | 0.62 | G | T | 0.039 | 0.010 | 3.00E-06 |
| T2D | *KIF9* | 3 | rs11926707 | 0.63 | C | T | 0.239 | 0.042 | 2.10E-08 |
| T2D | *MBNL1* | 3 | rs13065698 | 0.60 | A | G | 0.049 | 0.007 | 8.10E-13 |
| T2D | *SHQ1* | 3 | rs13085136 | 0.93 | C | T | 0.077 | 0.012 | 1.50E-08 |
| T2D | *IGF2BP2* | 3 | rs150111048 | 0.24 | G | A | 0.113 | 0.021 | 2.70E-07 |
| T2D | *IGF2BP2* | 3 | rs1516728 | 0.76 | A | T | 0.030 | 0.007 | 6.30E-06 |
| T2D | *UBE2E2* | 3 | rs17013314 | 0.03 | G | A | 0.104 | 0.018 | 8.40E-09 |
| T2D | *PPARG* | 3 | rs17819328 | 0.43 | G | T | 0.058 | 0.007 | 4.80E-16 |
| T2D | *ROBO2* | 3 | rs2272163 | 0.62 | C | A | 0.039 | 0.007 | 9.60E-09 |
| T2D | *RFT1* | 3 | rs2581787 | 0.56 | T | G | 0.039 | 0.007 | 2.40E-08 |
| T2D | *ABCC5* | 3 | rs2872246 | 0.45 | A | C | 0.039 | 0.007 | 1.50E-08 |
| T2D | *UBE2E2* | 3 | rs35352848 | 0.79 | T | C | 0.068 | 0.010 | 1.30E-17 |
| T2D | *MBNL1* | 3 | rs35497231 | 0.32 | C | T | 0.039 | 0.007 | 7.60E-08 |
| T2D | *PSMD6* | 3 | rs3774723 | 0.84 | G | A | 0.068 | 0.010 | 1.60E-13 |
| T2D | *ST6GAL1* | 3 | rs3887925 | 0.55 | T | C | 0.068 | 0.007 | 3.10E-22 |
| T2D | *LPP* | 3 | rs4686471 | 0.61 | C | T | 0.058 | 0.007 | 1.70E-20 |
| T2D | *RBM6* | 3 | rs4688760 | 0.68 | T | C | 0.039 | 0.007 | 3.50E-10 |
| T2D | *TMCC1* | 3 | rs559138871 | 0.00 | T | C | 0.399 | 0.089 | 7.30E-06 |
| T2D | *TSC22D2* | 3 | rs62271373 | 0.06 | A | T | 0.086 | 0.014 | 1.00E-09 |
| T2D | *SLC12A8* | 3 | rs649961 | 0.47 | T | C | 0.039 | 0.005 | 9.90E-10 |
| T2D | *IGF2BP2* | 3 | rs6780171 | 0.31 | A | T | 0.131 | 0.009 | 9.00E-56 |
| T2D | *PSMD6* | 3 | rs74368513 | 1.00 | G | A | 0.270 | 0.060 | 7.00E-06 |
| T2D | *MBNL1* | 3 | rs74653713 | 0.96 | C | A | 0.095 | 0.016 | 1.20E-08 |
| T2D | *KIF9* | 3 | rs75423501 | 0.10 | G | A | 0.049 | 0.012 | 7.50E-06 |
| T2D | *CACNA2D3* | 3 | rs76263492 | 0.05 | T | G | 0.086 | 0.016 | 6.30E-09 |
| T2D | *EGFEM1P* | 3 | rs7629630 | 0.86 | A | T | 0.049 | 0.010 | 2.50E-08 |
| T2D | *ST6GAL1* | 3 | rs7645517 | 0.06 | A | G | 0.077 | 0.014 | 2.50E-08 |
| T2D | *TMCC1* | 3 | rs9828772 | 0.90 | C | G | 0.058 | 0.010 | 4.20E-08 |
| T2D | *ADAMTS9* | 3 | rs9860730 | 0.70 | A | G | 0.058 | 0.007 | 4.90E-15 |
| T2D | *SLC2A2* | 3 | rs9873618 | 0.71 | G | A | 0.068 | 0.007 | 4.80E-21 |
| T2D | *WFS1* | 4 | rs10937721 | 0.59 | C | G | 0.058 | 0.010 | 1.50E-08 |
| T2D | *GNPDA2* | 4 | rs10938398 | 0.43 | A | G | 0.049 | 0.007 | 3.60E-12 |
| T2D | *PCGF3* | 4 | rs111827885 | 0.02 | C | T | 0.166 | 0.037 | 8.40E-06 |
| T2D | *USP46* | 4 | rs114447556 | 0.08 | T | C | 0.058 | 0.012 | 8.40E-06 |
| T2D | *LCORL* | 4 | rs12640250 | 0.72 | C | A | 0.039 | 0.005 | 3.70E-08 |
| T2D | *SCD5* | 4 | rs12642790 | 0.34 | A | G | 0.039 | 0.007 | 4.40E-10 |
| T2D | *PABPC4L* | 4 | rs1296328 | 0.45 | A | C | 0.039 | 0.007 | 3.50E-08 |
| T2D | *PCGF3* | 4 | rs1531583 | 0.05 | T | G | 0.122 | 0.016 | 3.50E-14 |
| T2D | *SLC9B1* | 4 | rs1580278 | 0.47 | C | A | 0.039 | 0.005 | 2.20E-10 |
| T2D | *WFS1* | 4 | rs1801212 | 0.71 | A | G | 0.049 | 0.010 | 4.50E-06 |
| T2D | *FAM13A* | 4 | rs1903002 | 0.50 | G | C | 0.039 | 0.007 | 2.70E-08 |
| T2D | *USP46* | 4 | rs2102278 | 0.32 | G | A | 0.039 | 0.007 | 3.70E-08 |
| T2D | *PDGFC* | 4 | rs28819812 | 0.68 | C | A | 0.039 | 0.007 | 2.20E-08 |
| T2D | *PCGF3* | 4 | rs35654957 | 0.37 | C | T | 0.030 | 0.007 | 4.20E-07 |
| T2D | *HTT* | 4 | rs362307 | 0.08 | T | C | 0.077 | 0.012 | 1.10E-09 |
| T2D | *MAEA* | 4 | rs56337234 | 0.50 | C | T | 0.058 | 0.007 | 8.60E-18 |
| T2D | *FAM13A* | 4 | rs576406049 | 0.00 | T | C | 0.501 | 0.104 | 1.60E-06 |
| T2D | *ACSL1* | 4 | rs58730668 | 0.86 | T | C | 0.068 | 0.010 | 1.30E-13 |
| T2D | *SMARCAD1* | 4 | rs6821438 | 0.53 | A | G | 0.039 | 0.007 | 4.00E-11 |
| T2D | *TMEM154* | 4 | rs7669833 | 0.71 | T | A | 0.058 | 0.007 | 1.20E-14 |
| T2D | *PAM* | 5 | rs115505614 | 0.05 | T | C | 0.174 | 0.015 | 1.30E-30 |
| T2D | *DMGDH* | 5 | rs1316776 | 0.65 | C | A | 0.049 | 0.007 | 2.60E-12 |
| T2D | *SLCO6A1* | 5 | rs138337556 | 0.00 | G | A | 0.445 | 0.077 | 4.70E-09 |
| T2D | *ANKH* | 5 | rs146886108 | 0.99 | C | T | 0.344 | 0.049 | 7.80E-13 |
| T2D | *ANKH* | 5 | rs17250977 | 0.04 | G | A | 0.113 | 0.016 | 2.00E-11 |
| T2D | *ITGA1* | 5 | rs17261179 | 0.52 | T | C | 0.039 | 0.007 | 1.30E-08 |
| T2D | *POC5* | 5 | rs2307111 | 0.61 | T | C | 0.049 | 0.007 | 2.10E-16 |
| T2D | *POC5* | 5 | rs2307111 | 0.61 | T | C | 0.049 | 0.007 | 2.10E-16 |
| T2D | *ANKRD55* | 5 | rs2431115 | 0.40 | A | G | 0.039 | 0.007 | 3.90E-10 |
| T2D | *PHF15* | 5 | rs244665 | 0.70 | A | G | 0.030 | 0.007 | 9.90E-06 |
| T2D | *ARL15* | 5 | rs279744 | 0.69 | C | A | 0.039 | 0.005 | 3.10E-08 |
| T2D | *PHF15* | 5 | rs329122 | 0.43 | A | G | 0.039 | 0.005 | 3.60E-09 |
| T2D | *ITGA1* | 5 | rs3811978 | 0.17 | G | A | 0.058 | 0.007 | 7.70E-11 |
| T2D | *ANKH* | 5 | rs3845281 | 0.90 | G | A | 0.077 | 0.009 | 2.30E-11 |
| T2D | *EBF1* | 5 | rs3934712 | 0.21 | C | T | 0.049 | 0.010 | 3.20E-08 |
| T2D | *ZBED3* | 5 | rs4457053 | 0.30 | G | A | 0.058 | 0.007 | 8.40E-18 |
| T2D | *ANKRD55* | 5 | rs465002 | 0.74 | T | C | 0.104 | 0.007 | 6.10E-38 |
| T2D | *PIK3R1* | 5 | rs4976033 | 0.41 | G | A | 0.049 | 0.007 | 1.00E-09 |
| T2D | *ITGA1* | 5 | rs62357230 | 0.03 | A | G | 0.086 | 0.019 | 5.90E-06 |
| T2D | *MRPS30* | 5 | rs62368490 | 0.03 | T | C | 0.095 | 0.019 | 3.40E-06 |
| T2D | *ARL15* | 5 | rs62370480 | 0.22 | A | G | 0.039 | 0.007 | 2.00E-06 |
| T2D | *MRPS30* | 5 | rs6884702 | 0.39 | G | A | 0.039 | 0.007 | 1.50E-10 |
| T2D | *ANKH* | 5 | rs6885132 | 0.90 | C | G | 0.068 | 0.012 | 1.70E-08 |
| T2D | *ARL15* | 5 | rs702634 | 0.69 | A | G | 0.049 | 0.007 | 7.70E-14 |
| T2D | *ANKH* | 5 | rs76549217 | 0.03 | T | C | 0.131 | 0.020 | 3.00E-10 |
| T2D | *RASA1* | 5 | rs7719891 | 0.26 | G | A | 0.039 | 0.007 | 2.40E-08 |
| T2D | *PAM* | 5 | rs78408340 | 0.01 | G | C | 0.385 | 0.038 | 2.10E-24 |
| T2D | *ANKRD55* | 5 | rs96844 | 0.26 | G | A | 0.039 | 0.005 | 5.40E-08 |
| T2D | *ANKRD55* | 5 | rs9687832 | 0.20 | A | G | 0.077 | 0.009 | 1.70E-20 |
| T2D | *RREB1* | 6 | rs112498319 | 0.41 | C | A | 0.030 | 0.007 | 4.20E-07 |
| T2D | *CENPW* | 6 | rs11759026 | 0.23 | G | A | 0.068 | 0.007 | 2.40E-18 |
| T2D | *VEGFA* | 6 | rs11967262 | 0.49 | G | C | 0.039 | 0.005 | 8.80E-10 |
| T2D | *HMGA1* | 6 | rs2233632 | 0.69 | T | C | 0.039 | 0.007 | 5.30E-07 |
| T2D | *TFAP2B* | 6 | rs2465043 | 0.64 | G | A | 0.030 | 0.005 | 2.90E-06 |
| T2D | *SOGA3* | 6 | rs2800733 | 0.72 | A | G | 0.049 | 0.007 | 6.00E-11 |
| T2D | *MIR3668* | 6 | rs2982521 | 0.38 | A | T | 0.049 | 0.007 | 1.30E-09 |
| T2D | *LRFN2* | 6 | rs34298980 | 0.50 | T | C | 0.039 | 0.005 | 9.30E-10 |
| T2D | *TFAP2B* | 6 | rs3798519 | 0.18 | C | A | 0.058 | 0.010 | 2.60E-12 |
| T2D | *QKI* | 6 | rs4709746 | 0.87 | C | T | 0.058 | 0.010 | 5.80E-09 |
| T2D | *SLC22A3* | 6 | rs474513 | 0.52 | A | G | 0.039 | 0.005 | 8.10E-10 |
| T2D | *BEND3* | 6 | rs4946812 | 0.67 | G | A | 0.039 | 0.005 | 8.20E-09 |
| T2D | *SLC25A51P1* | 6 | rs555402748 | 0.00 | T | C | 1.300 | 0.239 | 4.60E-08 |
| T2D | *MHC* | 6 | rs601945 | 0.18 | G | A | 0.058 | 0.010 | 4.70E-08 |
| T2D | *MIR3668* | 6 | rs616279 | 0.74 | A | G | 0.039 | 0.007 | 6.70E-07 |
| T2D | *VEGFA* | 6 | rs6458354 | 0.29 | C | T | 0.049 | 0.007 | 2.10E-12 |
| T2D | *HMGA1* | 6 | rs77136196 | 0.04 | T | C | 0.104 | 0.021 | 1.60E-08 |
| T2D | *CDKAL1* | 6 | rs7756992 | 0.27 | G | A | 0.140 | 0.009 | 2.40E-88 |
| T2D | *RREB1* | 6 | rs9379084 | 0.89 | G | A | 0.104 | 0.012 | 3.30E-21 |
| T2D | *SLC35D3* | 6 | rs9494624 | 0.29 | A | G | 0.039 | 0.007 | 6.10E-09 |
| T2D | *RREB1* | 6 | rs9505097 | 0.80 | C | T | 0.049 | 0.010 | 8.60E-10 |
| T2D | *DGKB* | 7 | rs10228066 | 0.54 | T | C | 0.068 | 0.007 | 1.10E-28 |
| T2D | *FBXL13* | 7 | rs11496066 | 0.82 | T | C | 0.077 | 0.014 | 1.10E-08 |
| T2D | *GCK* | 7 | rs116913033 | 0.83 | C | T | 0.039 | 0.010 | 7.10E-06 |
| T2D | *KLF14* | 7 | rs1562396 | 0.32 | G | A | 0.058 | 0.007 | 9.90E-18 |
| T2D | *JAZF1* | 7 | rs1708302 | 0.51 | C | T | 0.095 | 0.007 | 1.10E-48 |
| T2D | *DGKB* | 7 | rs17168486 | 0.18 | T | C | 0.068 | 0.007 | 2.30E-17 |
| T2D | *KLF14* | 7 | rs2268382 | 0.33 | C | A | 0.030 | 0.005 | 7.40E-06 |
| T2D | *DGKB* | 7 | rs2908334 | 0.63 | T | C | 0.030 | 0.005 | 5.90E-06 |
| T2D | *RELN* | 7 | rs39328 | 0.43 | T | C | 0.039 | 0.007 | 3.70E-08 |
| T2D | *IGF2BP3* | 7 | rs4279506 | 0.61 | G | C | 0.058 | 0.010 | 4.80E-08 |
| T2D | *FBXL13* | 7 | rs56376556 | 0.05 | T | C | 0.077 | 0.017 | 1.70E-06 |
| T2D | *RELN* | 7 | rs62482405 | 0.08 | G | T | 0.049 | 0.012 | 6.90E-06 |
| T2D | *AOC1* | 7 | rs62492368 | 0.31 | A | G | 0.049 | 0.007 | 1.10E-10 |
| T2D | *MNX1* | 7 | rs6459733 | 0.67 | G | C | 0.058 | 0.005 | 2.40E-17 |
| T2D | *CTTNBP2* | 7 | rs6976111 | 0.31 | A | C | 0.039 | 0.007 | 1.20E-08 |
| T2D | *IGF2BP3* | 7 | rs78840640 | 0.02 | G | C | 0.104 | 0.023 | 2.80E-06 |
| T2D | *GCK* | 7 | rs878521 | 0.25 | A | G | 0.058 | 0.007 | 1.90E-13 |
| T2D | *CRHR2* | 7 | rs917195 | 0.77 | C | T | 0.049 | 0.007 | 4.20E-11 |
| T2D | *LPL* | 8 | rs10096633 | 0.88 | C | T | 0.068 | 0.010 | 1.10E-12 |
| T2D | *TP53INP1* | 8 | rs10097617 | 0.49 | T | C | 0.039 | 0.007 | 3.30E-11 |
| T2D | *PURG* | 8 | rs10954772 | 0.31 | T | C | 0.039 | 0.007 | 1.80E-09 |
| T2D | *TP53INP1* | 8 | rs11786992 | 0.64 | A | C | 0.030 | 0.005 | 5.30E-06 |
| T2D | *TRHR* | 8 | rs12680028 | 0.53 | C | G | 0.039 | 0.007 | 2.50E-08 |
| T2D | *BOP1* | 8 | rs12719778 | 0.54 | T | C | 0.039 | 0.005 | 5.00E-09 |
| T2D | *ANK1* | 8 | rs13262861 | 0.83 | C | A | 0.068 | 0.010 | 4.00E-12 |
| T2D | *ANK1* | 8 | rs148766658 | 0.04 | C | T | 0.086 | 0.019 | 5.70E-07 |
| T2D | *CPQ* | 8 | rs149364428 | 0.01 | A | G | 0.239 | 0.034 | 1.80E-12 |
| T2D | *PVT1* | 8 | rs1561927 | 0.27 | C | T | 0.039 | 0.007 | 1.50E-09 |
| T2D | *MSRA* | 8 | rs17689007 | 0.53 | G | A | 0.039 | 0.005 | 2.50E-09 |
| T2D | *CASC11* | 8 | rs17772814 | 0.92 | G | A | 0.077 | 0.014 | 5.40E-10 |
| T2D | *TP53INP1* | 8 | rs187936726 | 0.02 | G | A | 0.104 | 0.023 | 5.40E-06 |
| T2D | *SLC30A8* | 8 | rs3802177 | 0.69 | G | A | 0.104 | 0.007 | 1.10E-55 |
| T2D | *ANK1* | 8 | rs4736819 | 0.55 | T | C | 0.039 | 0.007 | 5.40E-07 |
| T2D | *BOP1* | 8 | rs4977213 | 0.38 | C | T | 0.049 | 0.007 | 9.10E-14 |
| T2D | *XKR6* | 8 | rs57327348 | 0.78 | A | T | 0.039 | 0.010 | 4.50E-08 |
| T2D | *SLC30A8* | 8 | rs80244329 | 0.98 | G | A | 0.104 | 0.025 | 6.90E-06 |
| T2D | *CDKN2A/B* | 9 | rs10757283 | 0.43 | T | C | 0.104 | 0.009 | 1.70E-41 |
| T2D | *CDKN2A/B* | 9 | rs10811660 | 0.83 | G | A | 0.239 | 0.010 | 1.40E-115 |
| T2D | *GLIS3* | 9 | rs10974438 | 0.36 | C | A | 0.049 | 0.007 | 1.50E-14 |
| T2D | *MTND2P8* | 9 | rs11137820 | 0.58 | C | G | 0.039 | 0.007 | 2.90E-08 |
| T2D | *GPSM1* | 9 | rs11793035 | 0.33 | C | T | 0.039 | 0.007 | 2.20E-07 |
| T2D | *UBAP2* | 9 | rs12001437 | 0.37 | C | T | 0.039 | 0.007 | 2.80E-10 |
| T2D | *ZNF169* | 9 | rs12236906 | 0.99 | T | C | 0.140 | 0.031 | 3.40E-06 |
| T2D | *CDKN2A/B* | 9 | rs1333052 | 0.66 | A | C | 0.030 | 0.007 | 6.30E-07 |
| T2D | *LINGO2* | 9 | rs1412234 | 0.32 | C | T | 0.039 | 0.007 | 1.90E-10 |
| T2D | *CDKN2A/B* | 9 | rs1412830 | 0.63 | C | T | 0.039 | 0.007 | 9.10E-08 |
| T2D | *CDKN2A/B* | 9 | rs1575972 | 0.97 | T | A | 0.095 | 0.019 | 3.10E-07 |
| T2D | *TLE4* | 9 | rs17791513 | 0.93 | A | G | 0.095 | 0.012 | 3.10E-14 |
| T2D | *TLE1* | 9 | rs2796441 | 0.59 | G | A | 0.068 | 0.007 | 4.40E-24 |
| T2D | *GPSM1* | 9 | rs28505901 | 0.75 | G | A | 0.086 | 0.009 | 6.70E-26 |
| T2D | *ABO* | 9 | rs505922 | 0.33 | C | T | 0.049 | 0.007 | 3.90E-12 |
| T2D | *GLIS3* | 9 | rs510807 | 0.49 | A | C | 0.030 | 0.005 | 1.40E-06 |
| T2D | *ZNF169* | 9 | rs55653563 | 0.73 | A | C | 0.039 | 0.007 | 2.20E-09 |
| T2D | *HAUS6* | 9 | rs7022807 | 0.40 | G | A | 0.039 | 0.005 | 2.70E-10 |
| T2D | *CDKN2A/B* | 9 | rs76011118 | 0.03 | A | G | 0.104 | 0.018 | 1.40E-07 |
| T2D | *GPSM1* | 9 | rs78403475 | 0.90 | G | C | 0.058 | 0.012 | 1.20E-06 |
| T2D | *FOCAD* | 9 | rs7847880 | 0.84 | C | T | 0.039 | 0.007 | 2.10E-06 |
| T2D | *FOCAD* | 9 | rs7867635 | 0.41 | C | T | 0.039 | 0.007 | 4.00E-08 |
| T2D | *GLIS3* | 9 | rs79103584 | 0.99 | T | A | 0.131 | 0.029 | 4.40E-06 |
| T2D | *HHEX/IDE* | 10 | rs10882101 | 0.59 | T | C | 0.058 | 0.010 | 1.40E-08 |
| T2D | *HHEX/IDE* | 10 | rs1112718 | 0.60 | A | G | 0.058 | 0.012 | 5.00E-07 |
| T2D | *PTEN* | 10 | rs11202627 | 0.15 | T | C | 0.058 | 0.010 | 4.70E-08 |
| T2D | *CDC123/CAMK1D* | 10 | rs11257655 | 0.22 | T | C | 0.086 | 0.007 | 1.50E-32 |
| T2D | *ZMIZ1* | 10 | rs1317617 | 0.80 | G | A | 0.039 | 0.010 | 1.80E-06 |
| T2D | *TCF7L2* | 10 | rs140242150 | 0.01 | A | G | 0.307 | 0.056 | 2.20E-08 |
| T2D | *NEUROG3* | 10 | rs177045 | 0.32 | G | A | 0.068 | 0.007 | 6.60E-18 |
| T2D | *TCF7L2* | 10 | rs180988137 | 0.01 | G | A | 0.157 | 0.035 | 6.10E-06 |
| T2D | *TCF7L2* | 10 | rs184509201 | 0.98 | C | G | 0.191 | 0.025 | 1.20E-13 |
| T2D | *PLEKHA1* | 10 | rs2280141 | 0.52 | T | G | 0.049 | 0.007 | 1.40E-13 |
| T2D | *NEUROG3* | 10 | rs2642588 | 0.70 | G | T | 0.049 | 0.007 | 2.20E-14 |
| T2D | *TCF7L2* | 10 | rs34855922 | 0.72 | A | G | 0.049 | 0.007 | 5.50E-12 |
| T2D | *NEUROG3* | 10 | rs41277236 | 0.04 | T | C | 0.086 | 0.016 | 1.50E-06 |
| T2D | *TCF7L2* | 10 | rs536643418 | 0.01 | G | C | 0.405 | 0.073 | 2.60E-08 |
| T2D | *NEUROG3* | 10 | rs549498088 | 0.01 | T | C | 0.445 | 0.089 | 4.70E-07 |
| T2D | *NEUROG3* | 10 | rs61850200 | 0.28 | C | G | 0.039 | 0.007 | 7.30E-06 |
| T2D | *ZMIZ1* | 10 | rs703972 | 0.53 | G | C | 0.068 | 0.007 | 1.70E-29 |
| T2D | *HHEX/IDE* | 10 | rs7078559 | 0.58 | T | C | 0.030 | 0.007 | 4.10E-07 |
| T2D | *WDR11* | 10 | rs72631105 | 0.19 | A | G | 0.058 | 0.010 | 3.70E-09 |
| T2D | *TCF7L2* | 10 | rs78025551 | 0.85 | C | G | 0.049 | 0.010 | 1.60E-07 |
| T2D | *TCF7L2* | 10 | rs7903146 | 0.30 | T | C | 0.315 | 0.007 | 5.8E-447 |
| T2D | *TCF7L2* | 10 | rs7918400 | 0.48 | T | C | 0.058 | 0.007 | 2.00E-15 |
| T2D | *HSD17B12* | 11 | rs1061810 | 0.29 | A | C | 0.049 | 0.007 | 6.00E-13 |
| T2D | *ETS1* | 11 | rs10750397 | 0.28 | A | G | 0.049 | 0.007 | 8.30E-13 |
| T2D | *MTNR1B* | 11 | rs10830963 | 0.28 | G | C | 0.095 | 0.007 | 4.80E-43 |
| T2D | *ETS1* | 11 | rs10893829 | 0.85 | T | C | 0.058 | 0.010 | 1.30E-10 |
| T2D | *INS/IGF2* | 11 | rs11042596 | 0.67 | G | T | 0.039 | 0.005 | 2.00E-08 |
| T2D | *ETS1* | 11 | rs112595469 | 0.03 | T | C | 0.095 | 0.021 | 6.20E-06 |
| T2D | *CCND1* | 11 | rs11820019 | 0.97 | T | C | 0.148 | 0.020 | 5.10E-12 |
| T2D | *INS/IGF2* | 11 | rs12802972 | 0.43 | A | G | 0.030 | 0.007 | 1.50E-06 |
| T2D | *PDE3B* | 11 | rs141521721 | 0.02 | A | C | 0.122 | 0.020 | 2.70E-08 |
| T2D | *QSER1* | 11 | rs145678014 | 0.96 | G | T | 0.104 | 0.016 | 2.00E-10 |
| T2D | *MAP3K11* | 11 | rs1783541 | 0.20 | T | C | 0.058 | 0.007 | 2.00E-14 |
| T2D | *KCNQ1* | 11 | rs2237895 | 0.43 | C | A | 0.113 | 0.007 | 6.00E-52 |
| T2D | *KCNQ1* | 11 | rs2237897 | 0.95 | C | T | 0.207 | 0.017 | 8.40E-32 |
| T2D | *KCNQ1* | 11 | rs2283164 | 0.95 | A | G | 0.077 | 0.016 | 1.20E-07 |
| T2D | *KCNQ1* | 11 | rs2283220 | 0.69 | A | G | 0.049 | 0.007 | 1.40E-09 |
| T2D | *KCNQ1* | 11 | rs231349 | 0.10 | T | C | 0.068 | 0.012 | 2.30E-11 |
| T2D | *KCNQ1* | 11 | rs231361 | 0.26 | A | G | 0.077 | 0.007 | 5.00E-25 |
| T2D | *KCNQ1* | 11 | rs234853 | 0.25 | G | A | 0.077 | 0.009 | 6.80E-16 |
| T2D | *PDHX* | 11 | rs2767036 | 0.29 | C | A | 0.039 | 0.007 | 3.30E-08 |
| T2D | *PDHX* | 11 | rs286925 | 0.18 | A | G | 0.039 | 0.010 | 5.00E-06 |
| T2D | *KCNQ1* | 11 | rs445084 | 0.36 | G | A | 0.030 | 0.007 | 1.70E-06 |
| T2D | *METTL15* | 11 | rs4923543 | 0.33 | A | G | 0.039 | 0.007 | 4.50E-08 |
| T2D | *INS/IGF2* | 11 | rs4929965 | 0.38 | A | G | 0.068 | 0.007 | 4.00E-26 |
| T2D | *KCNQ1* | 11 | rs4930091 | 0.76 | C | T | 0.039 | 0.007 | 3.70E-06 |
| T2D | *KCNJ11* | 11 | rs5213 | 0.36 | C | T | 0.068 | 0.007 | 3.50E-27 |
| T2D | *QSER1* | 11 | rs528122639 | 0.00 | A | G | 0.737 | 0.141 | 1.60E-07 |
| T2D | *INS/IGF2* | 11 | rs555759341 | 0.00 | C | G | 0.322 | 0.059 | 3.60E-08 |
| T2D | *INS/IGF2* | 11 | rs571342427 | 0.00 | C | T | 0.519 | 0.107 | 1.00E-06 |
| T2D | *MTNR1B* | 11 | rs57235767 | 0.71 | C | T | 0.039 | 0.007 | 5.90E-10 |
| T2D | *CCND1* | 11 | rs61881115 | 0.84 | G | A | 0.049 | 0.007 | 4.10E-07 |
| T2D | *ETS1* | 11 | rs67232546 | 0.21 | T | C | 0.058 | 0.007 | 1.30E-11 |
| T2D | *KCNJ11* | 11 | rs67254669 | 0.00 | G | A | 0.637 | 0.111 | 1.10E-08 |
| T2D | *CRY2* | 11 | rs7115753 | 0.45 | A | G | 0.039 | 0.005 | 3.80E-09 |
| T2D | *CELF1* | 11 | rs7124681 | 0.41 | A | C | 0.039 | 0.005 | 5.10E-09 |
| T2D | *CENTD2/ARAP1* | 11 | rs77464186 | 0.84 | A | C | 0.104 | 0.009 | 4.70E-33 |
| T2D | *QSER1* | 11 | rs7943101 | 0.16 | T | C | 0.039 | 0.010 | 8.50E-06 |
| T2D | *KCNQ1* | 11 | rs80102379 | 0.98 | G | T | 0.140 | 0.027 | 9.30E-08 |
| T2D | *HMGA2* | 12 | rs1042725 | 0.49 | T | C | 0.049 | 0.007 | 1.80E-13 |
| T2D | *KLHDC5* | 12 | rs10842994 | 0.81 | C | T | 0.077 | 0.007 | 4.10E-20 |
| T2D | *CCND2* | 12 | rs10848958 | 0.80 | C | T | 0.039 | 0.007 | 1.50E-07 |
| T2D | *CCND2* | 12 | rs11063028 | 0.18 | C | T | 0.058 | 0.007 | 8.50E-11 |
| T2D | *HNF1A* | 12 | rs11065299 | 0.08 | A | G | 0.058 | 0.012 | 5.80E-07 |
| T2D | *KSR2* | 12 | rs12578639 | 0.83 | A | T | 0.039 | 0.010 | 2.20E-06 |
| T2D | *FBRSL1* | 12 | rs12811407 | 0.33 | A | G | 0.049 | 0.007 | 1.70E-12 |
| T2D | *WSCD2* | 12 | rs1426371 | 0.74 | G | A | 0.049 | 0.007 | 8.20E-12 |
| T2D | *TSPAN8/LGR5* | 12 | rs1796330 | 0.57 | G | C | 0.049 | 0.005 | 2.20E-14 |
| T2D | *HNF1A* | 12 | rs1800574 | 0.03 | T | C | 0.131 | 0.020 | 1.70E-12 |
| T2D | *CDKN1B* | 12 | rs2066827 | 0.24 | G | T | 0.049 | 0.007 | 4.20E-08 |
| T2D | *USP44* | 12 | rs2197973 | 0.54 | T | C | 0.039 | 0.007 | 3.60E-08 |
| T2D | *HMGA2* | 12 | rs2258238 | 0.10 | T | A | 0.095 | 0.012 | 4.50E-21 |
| T2D | *HNF1A* | 12 | rs28638142 | 0.04 | A | C | 0.077 | 0.017 | 2.90E-06 |
| T2D | *CCND2* | 12 | rs3217792 | 0.91 | C | T | 0.113 | 0.011 | 2.60E-21 |
| T2D | *CCND2* | 12 | rs3217860 | 0.26 | G | A | 0.049 | 0.007 | 3.90E-09 |
| T2D | *KSR2* | 12 | rs34965774 | 0.14 | A | G | 0.058 | 0.010 | 2.00E-09 |
| T2D | *MPHOSPH9* | 12 | rs4148856 | 0.78 | C | G | 0.049 | 0.010 | 1.70E-10 |
| T2D | *CCND2* | 12 | rs4238013 | 0.21 | C | T | 0.058 | 0.007 | 3.20E-11 |
| T2D | *RMST* | 12 | rs557027608 | 0.00 | A | G | 0.850 | 0.166 | 2.70E-07 |
| T2D | *HNF1A* | 12 | rs56348580 | 0.69 | G | C | 0.049 | 0.007 | 2.30E-13 |
| T2D | *ITPR2* | 12 | rs718314 | 0.25 | G | A | 0.049 | 0.007 | 8.40E-11 |
| T2D | *HNF1A* | 12 | rs73224262 | 0.01 | T | C | 0.215 | 0.041 | 9.10E-07 |
| T2D | *HNF1A* | 12 | rs73226260 | 0.97 | G | A | 0.122 | 0.018 | 5.90E-11 |
| T2D | *RMST* | 12 | rs759111467 | 0.00 | A | G | 1.122 | 0.234 | 1.70E-06 |
| T2D | *CCND2* | 12 | rs76895963 | 0.98 | T | G | 0.482 | 0.027 | 1.40E-69 |
| T2D | *RMST* | 12 | rs77864822 | 0.93 | A | G | 0.077 | 0.014 | 1.10E-08 |
| T2D | *ZNF664* | 12 | rs7978610 | 0.67 | G | C | 0.239 | 0.042 | 2.00E-08 |
| T2D | *ZNF664* | 12 | rs825452 | 0.60 | A | G | 0.039 | 0.007 | 2.40E-06 |
| T2D | *HMGB1* | 13 | rs11842871 | 0.74 | G | T | 0.039 | 0.007 | 1.20E-08 |
| T2D | *SPRY2* | 13 | rs1359790 | 0.72 | G | A | 0.086 | 0.007 | 2.40E-31 |
| T2D | *RNF6* | 13 | rs34584161 | 0.76 | A | G | 0.049 | 0.007 | 2.20E-10 |
| T2D | *IRS2* | 13 | rs4771648 | 0.67 | G | A | 0.039 | 0.007 | 8.90E-08 |
| T2D | *KL* | 13 | rs576674 | 0.17 | G | A | 0.049 | 0.007 | 8.30E-10 |
| T2D | *SRGAP2D* | 13 | rs76251711 | 0.01 | G | A | 0.148 | 0.031 | 2.30E-06 |
| T2D | *IRS2* | 13 | rs7987740 | 0.61 | T | C | 0.039 | 0.007 | 4.00E-08 |
| T2D | *PCDH17* | 13 | rs9537803 | 0.28 | C | T | 0.039 | 0.007 | 4.60E-08 |
| T2D | *SRGAP2D* | 13 | rs9563615 | 0.71 | A | T | 0.049 | 0.007 | 6.40E-11 |
| T2D | *PCDH17* | 13 | rs9569864 | 0.83 | C | T | 0.049 | 0.007 | 8.70E-08 |
| T2D | *DLEU1* | 13 | rs963740 | 0.71 | A | T | 0.039 | 0.005 | 2.10E-08 |
| T2D | *SLC7A7* | 14 | rs17122772 | 0.23 | G | C | 0.039 | 0.007 | 1.60E-08 |
| T2D | *AKAP6* | 14 | rs17522122 | 0.47 | T | G | 0.039 | 0.005 | 3.20E-09 |
| T2D | *NRXN3* | 14 | rs17836088 | 0.22 | C | G | 0.058 | 0.010 | 6.70E-14 |
| T2D | *MARK3* | 14 | rs62007683 | 0.65 | G | T | 0.039 | 0.007 | 3.10E-08 |
| T2D | *SMEK1* | 14 | rs8010382 | 0.42 | G | A | 0.039 | 0.005 | 6.50E-09 |
| T2D | *CLEC14A* | 14 | rs8017808 | 0.74 | G | T | 0.039 | 0.007 | 2.10E-08 |
| T2D | *HMG20A* | 15 | rs1005752 | 0.72 | A | C | 0.077 | 0.007 | 2.50E-29 |
| T2D | *LTK* | 15 | rs11070332 | 0.36 | A | G | 0.049 | 0.005 | 1.10E-13 |
| T2D | *TCF12* | 15 | rs117483894 | 0.04 | G | A | 0.095 | 0.016 | 3.90E-08 |
| T2D | *PRC1* | 15 | rs12910825 | 0.36 | G | A | 0.049 | 0.007 | 1.60E-15 |
| T2D | *PTPN9* | 15 | rs13737 | 0.76 | G | T | 0.049 | 0.007 | 5.60E-10 |
| T2D | *ONECUT1* | 15 | rs2456530 | 0.13 | T | C | 0.058 | 0.010 | 5.40E-09 |
| T2D | *RASGRP1* | 15 | rs34715063 | 0.12 | C | T | 0.095 | 0.012 | 2.30E-19 |
| T2D | *MAP2K5* | 15 | rs4776970 | 0.64 | A | T | 0.039 | 0.005 | 5.00E-09 |
| T2D | *AP3S2* | 15 | rs4932265 | 0.27 | T | C | 0.068 | 0.007 | 4.20E-20 |
| T2D | *WDR72* | 15 | rs528350911 | 0.01 | G | C | 0.239 | 0.042 | 2.10E-08 |
| T2D | *LTK* | 15 | rs543786825 | 0.00 | T | C | 1.147 | 0.250 | 4.70E-06 |
| T2D | *USP3* | 15 | rs7178762 | 0.46 | C | T | 0.039 | 0.005 | 5.40E-10 |
| T2D | *RASGRP1* | 15 | rs8032939 | 0.25 | C | T | 0.058 | 0.007 | 3.50E-14 |
| T2D | *C2CD4A/B* | 15 | rs8037894 | 0.57 | G | C | 0.049 | 0.007 | 2.60E-13 |
| T2D | *FAM57B* | 16 | rs11642430 | 0.40 | G | C | 0.039 | 0.005 | 2.20E-09 |
| T2D | *SPG7* | 16 | rs12920022 | 0.16 | A | T | 0.049 | 0.007 | 3.40E-09 |
| T2D | *FTO* | 16 | rs1421085 | 0.42 | C | T | 0.122 | 0.007 | 3.10E-84 |
| T2D | *FAM57B* | 16 | rs199795270 | 0.01 | C | G | 0.223 | 0.045 | 1.20E-06 |
| T2D | *CMIP* | 16 | rs2925979 | 0.30 | T | C | 0.049 | 0.007 | 1.40E-14 |
| T2D | *BCAR1* | 16 | rs3115960 | 0.37 | G | C | 0.030 | 0.007 | 2.80E-06 |
| T2D | *CLUAP1* | 16 | rs3751837 | 0.22 | T | C | 0.039 | 0.007 | 1.40E-08 |
| T2D | *FTO* | 16 | rs4281707 | 0.54 | G | A | 0.039 | 0.005 | 3.20E-10 |
| T2D | *ITFG3* | 16 | rs6600191 | 0.83 | T | C | 0.058 | 0.007 | 9.30E-13 |
| T2D | *BCAR1* | 16 | rs72802342 | 0.92 | C | A | 0.157 | 0.013 | 4.00E-32 |
| T2D | *FTO* | 16 | rs78020297 | 0.05 | A | G | 0.086 | 0.014 | 6.50E-09 |
| T2D | *ATP2A1* | 16 | rs8046545 | 0.36 | G | A | 0.039 | 0.007 | 1.90E-08 |
| T2D | *NFAT5* | 16 | rs862320 | 0.58 | C | T | 0.039 | 0.007 | 3.90E-11 |
| T2D | *ZZEF1* | 17 | rs1043246 | 0.16 | G | C | 0.049 | 0.010 | 7.90E-07 |
| T2D | *HNF1B* | 17 | rs10908278 | 0.48 | T | A | 0.077 | 0.007 | 6.40E-36 |
| T2D | *HNF1B* | 17 | rs10962 | 0.23 | C | G | 0.049 | 0.010 | 9.90E-10 |
| T2D | *BPTF* | 17 | rs11657492 | 0.10 | G | T | 0.058 | 0.010 | 5.60E-08 |
| T2D | *ZZEF1* | 17 | rs1377807 | 0.31 | C | G | 0.049 | 0.007 | 4.20E-13 |
| T2D | *ATP1B2* | 17 | rs1641523 | 0.43 | C | T | 0.049 | 0.007 | 1.20E-10 |
| T2D | *HNF1B* | 17 | rs2189301 | 0.87 | G | A | 0.049 | 0.012 | 6.50E-08 |
| T2D | *ACE* | 17 | rs2727301 | 0.75 | T | C | 0.039 | 0.007 | 1.30E-06 |
| T2D | *MLX* | 17 | rs34855406 | 0.28 | C | G | 0.049 | 0.007 | 2.30E-12 |
| T2D | *TTLL6* | 17 | rs35895680 | 0.68 | C | A | 0.058 | 0.007 | 2.50E-15 |
| T2D | *ZZEF1* | 17 | rs3826482 | 0.58 | A | T | 0.030 | 0.007 | 2.10E-07 |
| T2D | *RAI1* | 17 | rs4925109 | 0.32 | A | G | 0.049 | 0.007 | 2.80E-12 |
| T2D | *BPTF* | 17 | rs558308082 | 0.00 | C | G | 0.713 | 0.158 | 6.60E-06 |
| T2D | *KIF2B* | 17 | rs569511541 | 0.00 | G | A | 2.032 | 0.358 | 1.50E-08 |
| T2D | *ACE* | 17 | rs60276348 | 0.14 | T | C | 0.049 | 0.010 | 2.60E-08 |
| T2D | *BPTF* | 17 | rs61676547 | 0.19 | C | G | 0.058 | 0.007 | 2.90E-11 |
| T2D | *ATP1B2* | 17 | rs62059712 | 0.92 | T | C | 0.068 | 0.014 | 4.90E-06 |
| T2D | *NF1* | 17 | rs71372253 | 0.06 | C | T | 0.077 | 0.012 | 4.40E-08 |
| T2D | *GLP2R* | 17 | rs7222481 | 0.32 | C | G | 0.039 | 0.005 | 1.40E-08 |
| T2D | *BCL2A* | 18 | rs10469140 | 0.49 | G | A | 0.030 | 0.005 | 6.60E-06 |
| T2D | *BCL2A* | 18 | rs12454712 | 0.61 | T | C | 0.049 | 0.005 | 4.60E-13 |
| T2D | *WDR7* | 18 | rs17684074 | 0.74 | G | C | 0.039 | 0.007 | 2.90E-08 |
| T2D | *TCF4* | 18 | rs28719468 | 0.16 | C | T | 0.039 | 0.010 | 1.90E-06 |
| T2D | *MC4R* | 18 | rs523288 | 0.24 | T | A | 0.049 | 0.007 | 7.60E-13 |
| T2D | *COMMD9* | 18 | rs62080313 | 0.12 | C | T | 0.058 | 0.010 | 1.00E-08 |
| T2D | *LAMA1* | 18 | rs7240767 | 0.38 | C | T | 0.039 | 0.007 | 1.60E-08 |
| T2D | *TCF4* | 18 | rs72926932 | 0.08 | C | A | 0.086 | 0.012 | 1.00E-14 |
| T2D | *MC4R* | 18 | rs74452128 | 0.98 | C | A | 0.140 | 0.022 | 1.00E-09 |
| T2D | *TCF4* | 18 | rs76197067 | 0.00 | G | A | 0.986 | 0.220 | 8.10E-06 |
| T2D | *GRP* | 18 | rs9957145 | 0.83 | G | A | 0.049 | 0.010 | 8.10E-09 |
| T2D | *PEPD* | 19 | rs10406327 | 0.52 | C | G | 0.039 | 0.007 | 3.80E-08 |
| T2D | *GIPR* | 19 | rs10406431 | 0.56 | A | G | 0.049 | 0.005 | 9.60E-14 |
| T2D | *PTPRS* | 19 | rs116953931 | 0.04 | A | G | 0.077 | 0.019 | 6.40E-06 |
| T2D | *TM6SF2* | 19 | rs188247550 | 0.02 | T | C | 0.140 | 0.031 | 5.20E-06 |
| T2D | *GIPR* | 19 | rs2238689 | 0.42 | C | T | 0.039 | 0.005 | 5.40E-09 |
| T2D | *FARSA* | 19 | rs3111316 | 0.59 | A | G | 0.049 | 0.007 | 6.30E-13 |
| T2D | *ZC3H4* | 19 | rs3810291 | 0.67 | A | G | 0.049 | 0.007 | 8.90E-12 |
| T2D | *ZC3H4* | 19 | rs3810291 | 0.67 | A | G | 0.049 | 0.007 | 8.90E-12 |
| T2D | *TOMM40/APOE* | 19 | rs429358 | 0.85 | T | C | 0.077 | 0.009 | 2.60E-18 |
| T2D | *TOMM40/APOE* | 19 | rs429358 | 0.85 | T | C | 0.077 | 0.009 | 2.60E-18 |
| T2D | *MAP2K7* | 19 | rs4804833 | 0.39 | A | G | 0.049 | 0.007 | 7.70E-13 |
| T2D | *GIPR* | 19 | rs533172266 | 0.00 | T | C | 0.846 | 0.182 | 3.70E-06 |
| T2D | *UHRF1* | 19 | rs7249758 | 0.20 | A | G | 0.049 | 0.010 | 3.40E-09 |
| T2D | *TOMM40/APOE* | 19 | rs745903616 | 0.00 | A | G | 0.476 | 0.107 | 8.30E-06 |
| T2D | *INSR* | 19 | rs75253922 | 0.19 | C | T | 0.049 | 0.007 | 2.70E-08 |
| T2D | *FARSA* | 19 | rs755734872 | 0.00 | T | C | 0.863 | 0.194 | 8.30E-06 |
| T2D | *TM6SF2* | 19 | rs8107974 | 0.08 | T | A | 0.095 | 0.012 | 3.30E-15 |
| T2D | *HNF4A* | 20 | rs11696357 | 0.93 | A | G | 0.058 | 0.012 | 9.90E-06 |
| T2D | *CEBPB* | 20 | rs11699802 | 0.54 | C | T | 0.039 | 0.007 | 1.80E-11 |
| T2D | *NKX2.2* | 20 | rs13041756 | 0.11 | C | T | 0.058 | 0.010 | 1.40E-08 |
| T2D | *HNF4A* | 20 | rs1800961 | 0.04 | T | C | 0.166 | 0.017 | 2.30E-22 |
| T2D | *HNF4A* | 20 | rs1800961 | 0.04 | T | C | 0.166 | 0.017 | 2.30E-22 |
| T2D | *HNF4A* | 20 | rs191830490 | 0.99 | G | A | 0.215 | 0.047 | 2.20E-06 |
| T2D | *RALY* | 20 | rs2268078 | 0.66 | A | G | 0.039 | 0.007 | 2.30E-10 |
| T2D | *TSHZ2* | 20 | rs34454109 | 0.77 | A | T | 0.039 | 0.007 | 7.10E-09 |
| T2D | *HNF4A* | 20 | rs4810426 | 0.11 | T | C | 0.086 | 0.012 | 3.10E-17 |
| T2D | *EYA2* | 20 | rs560716466 | 0.00 | A | G | 0.307 | 0.069 | 9.80E-06 |
| T2D | *TCEA2* | 20 | rs59944054 | 0.24 | A | G | 0.058 | 0.010 | 1.50E-08 |
| T2D | *ZBTB46* | 20 | rs6011155 | 0.63 | T | C | 0.039 | 0.007 | 6.30E-06 |
| T2D | *EYA2* | 20 | rs6063048 | 0.73 | G | A | 0.049 | 0.007 | 2.20E-11 |
| T2D | *GNAS* | 20 | rs6070625 | 0.52 | G | C | 0.049 | 0.005 | 5.30E-14 |
| T2D | *HNF4A* | 20 | rs76811102 | 0.04 | T | C | 0.086 | 0.016 | 1.10E-07 |
| T2D | *GNAS* | 20 | rs862016 | 0.08 | G | A | 0.068 | 0.012 | 1.10E-07 |
| T2D | *PIM3* | 22 | rs112915006 | 0.05 | G | A | 0.077 | 0.014 | 9.80E-07 |
| T2D | *YWHAH* | 22 | rs117001013 | 0.91 | C | T | 0.068 | 0.012 | 1.70E-08 |
| T2D | *PIM3* | 22 | rs1801645 | 0.28 | C | T | 0.039 | 0.007 | 1.50E-08 |
| T2D | *EP300* | 22 | rs5758223 | 0.72 | A | G | 0.039 | 0.005 | 3.80E-08 |
| T2D | *MTMR3/ASCC2* | 22 | rs6518681 | 0.91 | G | A | 0.086 | 0.012 | 1.10E-12 |
| T2D | *PNPLA3* | 22 | rs738408 | 0.23 | T | C | 0.049 | 0.010 | 1.40E-10 |
| FG | *PROX1* | 1 | rs340874 | 0.52 | C | T | 0.013 | 0.002 | 4.08E-10 |
| FG | *G6PC2* | 2 | rs560887 | 0.7 | C | T | 0.071 | 0.002 | 0.00E+00 |
| FG | *GCKR* | 2 | rs780094 | 0.61 | C | T | 0.027 | 0.002 | 2.58E-37 |
| FG | *ADCY5* | 3 | rs11708067 | 0.79 | A | G | 0.023 | 0.003 | 1.30E-18 |
| FG | *AMT* | 3 | rs11715915 | 0.68 | C | T | 0.012 | 0.002 | 4.90E-08 |
| FG | *SLC2A2* | 3 | rs11920090 | 0.86 | T | A | 0.026 | 0.003 | 8.56E-18 |
| FG | *IGF2BP2* | 3 | rs7651090 | 0.31 | G | A | 0.013 | 0.002 | 1.75E-08 |
| FG | *PCSK1* | 5 | rs4869272 | 0.69 | T | C | 0.018 | 0.002 | 1.02E-15 |
| FG | *ZBED3* | 5 | rs7708285 | 0.27 | G | A | 0.015 | 0.003 | 1.20E-08 |
| FG | *RREB1* | 6 | rs17762454 | 0.26 | T | C | 0.014 | 0.002 | 9.57E-09 |
| FG | *CDKAL1* | 6 | rs9368222 | 0.28 | A | C | 0.014 | 0.002 | 1.00E-09 |
| FG | *DGKB/TMEM195* | 7 | rs2191349 | 0.53 | T | G | 0.029 | 0.002 | 0.00E+00 |
| FG | *GCK* | 7 | rs4607517 | 0.16 | A | G | 0.057 | 0.003 | 0.00E+00 |
| FG | *GRB10* | 7 | rs6943153 | 0.34 | T | C | 0.015 | 0.002 | 1.63E-12 |
| FG | *SLC30A8* | 8 | rs11558471 | 0.68 | A | G | 0.029 | 0.002 | 7.80E-37 |
| FG | *PPP1R3B* | 8 | rs983309 | 0.12 | T | G | 0.026 | 0.003 | 6.29E-15 |
| FG | *CDKN2B* | 9 | rs10811661 | 0.82 | T | C | 0.024 | 0.003 | 5.65E-18 |
| FG | *IKBKAP* | 9 | rs16913693 | 0.97 | T | G | 0.043 | 0.007 | 3.51E-11 |
| FG | *LOC728489* | 9 | rs3829109 | 0.71 | G | A | 0.017 | 0.003 | 1.13E-10 |
| FG | *GLIS3* | 9 | rs7867224 | 0.51 | A | G | 0.013 | 0.002 | 3.90E-09 |
| FG | *ADRA2A* | 10 | rs10885122 | 0.88 | G | T | 0.027 | 0.003 | 6.32E-17 |
| FG | *TCF7L2* | 10 | rs4506565 | 0.3 | T | A | 0.021 | 0.002 | 3.95E-19 |
| FG | *MTNR1B* | 11 | rs10830963 | 0.29 | G | C | 0.078 | 0.002 | 0.00E+00 |
| FG | *ARAP1* | 11 | rs11603334 | 0.83 | G | A | 0.019 | 0.003 | 1.12E-11 |
| FG | *CRY2* | 11 | rs11605924 | 0.49 | A | C | 0.02 | 0.002 | 3.93E-19 |
| FG | *FADS1* | 11 | rs174550 | 0.66 | T | C | 0.019 | 0.002 | 1.34E-17 |
| FG | *MADD* | 11 | rs7944584 | 0.73 | A | T | 0.023 | 0.002 | 4.82E-22 |
| FG | *P2RX2* | 12 | rs10747083 | 0.66 | A | G | 0.013 | 0.002 | 7.57E-09 |
| FG | *GLS2* | 12 | rs2657879 | 0.18 | G | A | 0.016 | 0.003 | 3.94E-08 |
| FG | *PDX1* | 13 | rs11619319 | 0.23 | G | A | 0.019 | 0.002 | 1.33E-15 |
| FG | *KL* | 13 | rs576674 | 0.15 | G | A | 0.017 | 0.003 | 2.26E-08 |
| FG | *WARS* | 14 | rs3783347 | 0.79 | G | T | 0.017 | 0.003 | 1.32E-10 |
| FG | *VPS13C/C2CD4A/B* | 15 | rs11071657 | 0.63 | A | G | 0.01 | 0.002 | 2.96E-07 |
| FG | *TOP1* | 20 | rs6072275 | 0.16 | A | G | 0.016 | 0.003 | 1.66E-08 |
| FG | *FOXA2* | 20 | rs6113722 | 0.96 | G | A | 0.035 | 0.005 | 2.49E-11 |
| FI | *LYPLAL1* | 1 | rs4846565 | 0.67 | G | A | 0.013 | 0.002 | 1.76E-09 |
| FI | *GRB14* | 2 | rs10195252 | 0.60 | T | C | 0.016 | 0.003 | 1.26E-16 |
| FI | *YSK4* | 2 | rs1530559 | 0.52 | A | G | 0.015 | 0.003 | 3.37E-08 |
| FI | *IRS1* | 2 | rs2943645 | 0.63 | T | C | 0.019 | 0.002 | 2.26E-19 |
| FI | *GCKR* | 2 | rs780094 | 0.61 | C | T | 0.019 | 0.002 | 7.06E-14 |
| FI | *GRB14* | 2 | rs10195252 | 0.59 | T | C | 0.016 | 0.003 | 4.87E-10 |
| FI | *PPARG* | 3 | rs17036328 | 0.86 | T | C | 0.021 | 0.003 | 3.59E-12 |
| FI | *FAM13A1* | 4 | rs3822072 | 0.48 | A | G | 0.012 | 0.002 | 1.80E-08 |
| FI | *TET2* | 4 | rs974801 | 0.38 | G | A | 0.014 | 0.002 | 3.27E-11 |
| FI | *ANKRD55* | 5 | rs459193 | 0.73 | G | A | 0.015 | 0.002 | 1.15E-10 |
| FI | *ARL15* | 5 | rs4865796 | 0.67 | A | G | 0.015 | 0.003 | 2.16E-12 |
| FI | *ARL15* | 5 | rs4865796 | 0.67 | A | G | 0.015 | 0.003 | 2.09E-08 |
| FI | *RSPO3* | 6 | rs2745353 | 0.51 | T | C | 0.014 | 0.002 | 5.48E-09 |
| FI | *C6orf107* | 6 | rs6912327 | 0.80 | T | C | 0.017 | 0.003 | 2.26E-08 |
| FI | *HIP1* | 7 | rs1167800 | 0.54 | A | G | 0.016 | 0.003 | 2.61E-09 |
| FI | *PPP1R3B* | 8 | rs2126259 | 0.11 | T | C | 0.024 | 0.003 | 3.30E-13 |
| FI | *TCF7L2* | 10 | rs7903146 | 0.72 | C | T | 0.018 | 0.003 | 6.13E-11 |
| FI | *IGF1* | 12 | rs860598 | 0.83 | A | G | 0.018 | 0.003 | 1.64E-08 |
| FI | *FTO* | 16 | rs1421085 | 0.42 | C | T | 0.02 | 0.003 | 1.87E-15 |
| FI | *PEPD* | 19 | rs731839 | 0.34 | G | A | 0.015 | 0.003 | 1.72E-08 |
| FI | *PEPD* | 19 | rs731839 | 0.34 | G | A | 0.015 | 0.003 | 5.13E-12 |

Chr indicates chromosome; EA, effect allele; EAF, effect allele frequency; FG, fasting glucose; FI, fasting insulin; NEA, non-effect allele; SE, standard error;

a The beta coefficients represent the one standard deviation change in levels of log of fasting glucose and insulin levels and one-unit increase in the log odds ratio of having type 2 diabetes for each additional effect allele.

b Selection of SNPs for T2DM was based on the locus-wide association significance level. Selection of SNPs for FG and FI was based on the genome-wide association significance level.

**Supplementary Table 4. SNPs used as instrumental variable for pancreatic cancer**

| **Nearby gene** | **Chr** | **rsID** | **EA** | **NEA** | **Betaa** | **SE** |
| --- | --- | --- | --- | --- | --- | --- |
| *NOC2L* | 1 | rs13303010 | G | A | 0.231 | 0.032 |
| *TNS3* | 7 | rs73328514 | A | T | 0.163 | 0.030 |
| *HNF4G* | 8 | rs2941471 | A | G | 0.117 | 0.023 |
| *HNF1B* | 17 | rs4795218 | G | A | 0.128 | 0.023 |
| *GRP* | 18 | rs1517037 | C | T | 0.151 | 0.033 |
| *RNU6-609P* | 1 | rs2816938 | A | T | 0.191 | 0.019 |
| *NR5A2* | 1 | rs3790844 | A | G | 0.211 | 0.032 |
| *ETAA1* | 2 | rs1486134 | G | T | 0.122 | 0.018 |
| *TP63* | 3 | rs9854771 | G | A | 0.105 | 0.023 |
| *TERT* | 5 | rs2736098 | C | T | 0.174 | 0.028 |
| *TERT* | 5 | rs35226131 | C | T | 0.400 | 0.108 |
| *CLPTM1L* | 5 | rs401681 | T | C | 0.174 | 0.017 |
| *SUGCT* | 7 | rs17688601 | C | A | 0.128 | 0.026 |
| *LINC-PINT* | 7 | rs6971499 | T | C | 0.211 | 0.034 |
| *CASC11* | 8 | rs10094872 | T | A | 0.131 | 0.020 |
| *LINC00824* | 8 | rs1561927 | T | C | 0.117 | 0.023 |
| *ABO* | 9 | rs505922 | C | T | 0.239 | 0.018 |
| *PDX1* | 13 | rs9581943 | A | G | 0.140 | 0.015 |
| *RP11-309J13.1* | 13 | rs9543325 | C | T | 0.215 | 0.019 |
| *BCAR1* | 16 | rs7190458 | A | G | 0.307 | 0.032 |
| *LINC00511* | 17 | rs7214041 | T | C | 0.223 | 0.023 |
| *ZNRF3* | 22 | rs16986825 | T | C | 0.140 | 0.022 |

Chr indicates chromosome; EA, effect allele; NEA, non-effect allele; SE, standard error;

a The beta coefficients represent the one-unit change in the log odds ratio of having type 2 diabetes for each additional effect allele.

**Supplementary Table 5. Characteristics of Mendelian randomization studies of T2DM-related traits and cancer risk**

| **First author** | **Year** | **Outcome** | **Cases** | **Controls** | **Exposurea** | **SNPs** | **Variance explained** | **OR (95% CI) b** | **P** |
| --- | --- | --- | --- | --- | --- | --- | --- | --- | --- |
| Nead K.T. | 2015 | Endometrial Cancer | 1782 | 8273 | T2DM | 49 | 5.0 | 0.91 (0.79, 1.04) | 0.16 |
|  |  |  |  |  | FG | 36 | 4.8 | 1.00 (0.67, 1.50) | 0.99 |
|  |  |  |  |  | FI | 18 | 1.0 | 2.34 (1.06, 5.14) | 0.03 |
| Carreras-Torres R. | 2016 | Renal cell carcinoma | 12 104 | 24 999 | FI | NA | NA | 1.77 (1.27, 2.46) | 7×10-4 |
| Carreras-Torres R. | 2017 | Pancreatic cancer | 7110 | 7264 | T2DM | 44 | 5.7 | 1.03 (0.95, 1.11) | 0.47 |
|  |  |  |  |  | FG | 37 | 4.8 | 0.94 (0.72, 1.21) | 0.61 |
|  |  |  |  |  | FI | 17 | 1.2 | 1.66 (1.05, 2.63) | 0.03 |
| Carreras-Torres R. | 2017 | Lung cancer | 29 266 | 56 450 | FG | 25 | 4.8 | 1.10 (0.96, 1.26) | 0.19 |
|  |  |  |  |  | FI | 11 | 1.2 | 1.63 (1.25, 2.13) | 3.2×10-4 |
| Song M. | 2018 | Colorectal cancer | 26 357 | 20 505 | T2DM (M) | 78 | NA | 0.96 (0.90, 1.03) | 0.25 |
|  |  |  |  |  | T2DM (F) | 78 | NA | 1.02 (0.95, 1.08) | 0.62 |
|  |  |  |  |  | FG (M) | 36 | NA | 1.20 (0.90, 1.59) | 0.22 |
|  |  |  |  |  | FG (F) | 36 | NA | 0.91 (0.68, 1.20) | 0.49 |
| Johansson M. | 2019 | Renal cell carcinoma | 10 784 | 20 406 | T2DM | 39 | 5.7 | 0.99 (0.93, 1.05) | 0.74 |
|  |  |  |  |  | FG | 37 | 4.8 | 0.92 (0.76, 1.12) | 0.43 |
| Yarmolinsky J. | 2019 | Epithelial ovarian cancer | 22 406 | 40 941 | T2DM | 10 | 0.34 | 1.00 (0.97, 1.02) | 0.81 |

a F indicates female; M, Male; The unit for T2DM was one unit increase in log odds of having T2DM, for FG and FI was one standard deviation increment of levels.

b We extracted OR (95% CI) derived from inverse-variance weighted method.

**Supplementary Table 6. Power estimation in the analysis of MR associations between type 2 diabetes mellitus and cancer risk**

| **Exposure*** | **Outcome** | **Sample size** | **Cases** | **Odds ratio** | | |
| --- | --- | --- | --- | --- | --- | --- |
| **0.90** | **1.1** | **1.2** |
| T2DM | Overall cancer (UKBB) | 367 643 | 75 037 | 1.00 | 1.00 | 1.00 |
| T2DM | Breast (BCAC) | 228 951 | 122 977 | 1.00 | 1.00 | 1.00 |
| T2DM | Breast (UKBB) | 367 643 | 13 666 | 1.00 | 1.00 | 1.00 |
| T2DM | Prostate | 367 643 | 7872 | 0.96 | 0.95 | 1.00 |
| T2DM | Bowel | 367 643 | 5486 | 0.87 | 0.86 | 1.00 |
| T2DM | Melanoma | 367 643 | 4869 | 0.83 | 0.82 | 1.00 |
| T2DM | Lung | 367 643 | 2838 | 0.60 | 0.60 | 0.99 |
| T2DM | Bladder | 367 643 | 2588 | 0.56 | 0.56 | 0.99 |
| T2DM | Non-Hodgkin lymphoma | 367 643 | 2296 | 0.51 | 0.51 | 0.98 |
| T2DM | Uterus | 367 643 | 1931 | 0.45 | 0.45 | 0.95 |
| T2DM | Cervix | 367 643 | 1928 | 0.45 | 0.45 | 0.95 |
| T2DM | Head-neck | 367 643 | 1615 | 0.39 | 0.39 | 0.92 |
| T2DM | Ovary | 367 643 | 1520 | 0.37 | 0.37 | 0.90 |
| T2DM | Leukemia | 367 643 | 1403 | 0.34 | 0.34 | 0.88 |
| T2DM | Kidney | 367 643 | 1310 | 0.33 | 0.33 | 0.85 |
| T2DM | Pancreas | 367 643 | 1264 | 0.32 | 0.32 | 0.84 |
| T2DM | Oesophagus | 367 643 | 843 | 0.23 | 0.23 | 0.68 |
| T2DM | Brain | 367 643 | 810 | 0.22 | 0.22 | 0.66 |
| T2DM | Stomach | 367 643 | 736 | 0.20 | 0.20 | 0.62 |
| T2DM | Testis | 367 643 | 735 | 0.20 | 0.20 | 0.62 |
| T2DM | Multiple myeloma | 367 643 | 656 | 0.19 | 0.19 | 0.57 |
| T2DM | Biliary tract | 367 643 | 387 | 0.13 | 0.13 | 0.37 |
| T2DM | Thyroid | 367 643 | 375 | 0.13 | 0.13 | 0.37 |
| T2DM | Liver | 367 643 | 324 | 0.12 | 0.12 | 0.32 |

*The variance explained by the genetic variants associated with type 2 diabetes is 17.4%.

**Supplementary Figure** **1. Flow chart of systematic review**

**
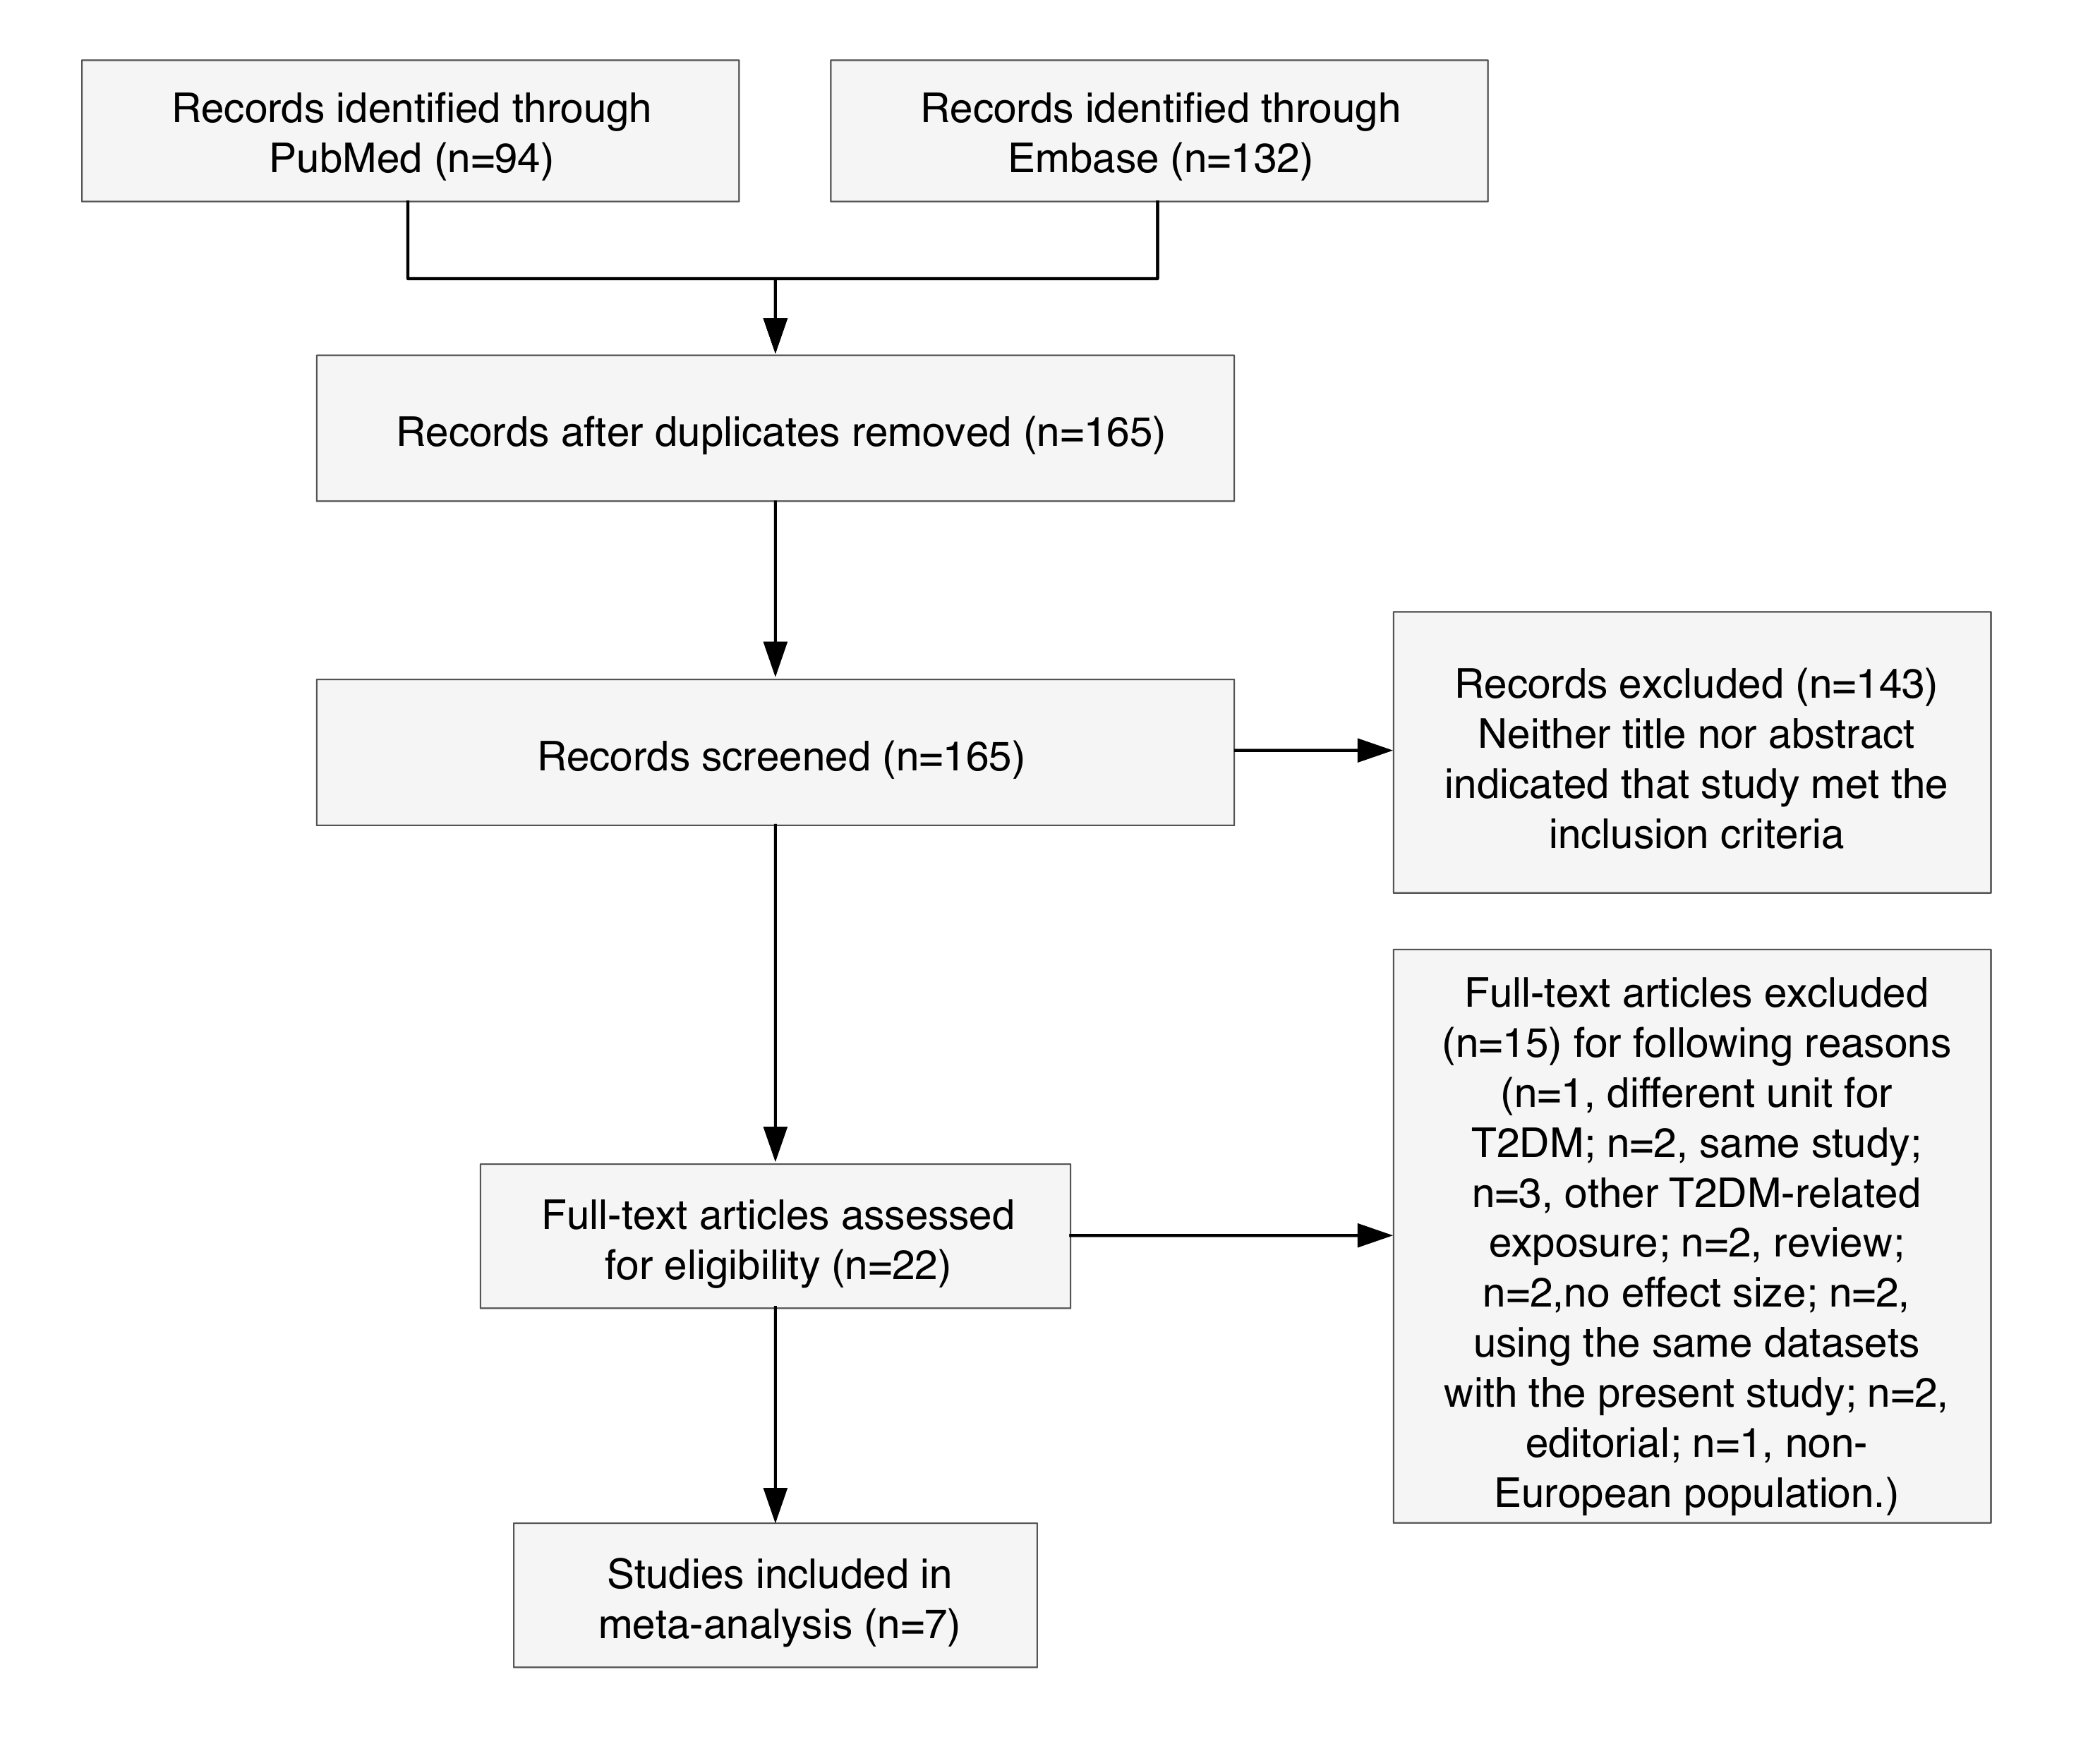
**

* Searching strategy: PubMed ((diabetes OR glucose OR insulin OR glycemic) AND (cancer or carcinoma) AND (Mendelian randomization or Mendelian randomisation OR instrumental variable causal inference OR causal inference using instrumental variable OR causal inference using genetic variants))). Embase (('diabetes mellitus' OR glucose OR insulin OR glycemic) AND (cancer OR carcinoma) AND ('mendelian randomization' OR 'mendelian randomisation' OR ‘instrumental variable causal inference’ OR ‘causal inference using instrumental variable’ OR ‘causal inference using genetic variants’))

**Supplementary Figure** **2. Association of type 2 diabetes with 22-site specific cancers using 295 SNPs at the genome-wide significance level**

**
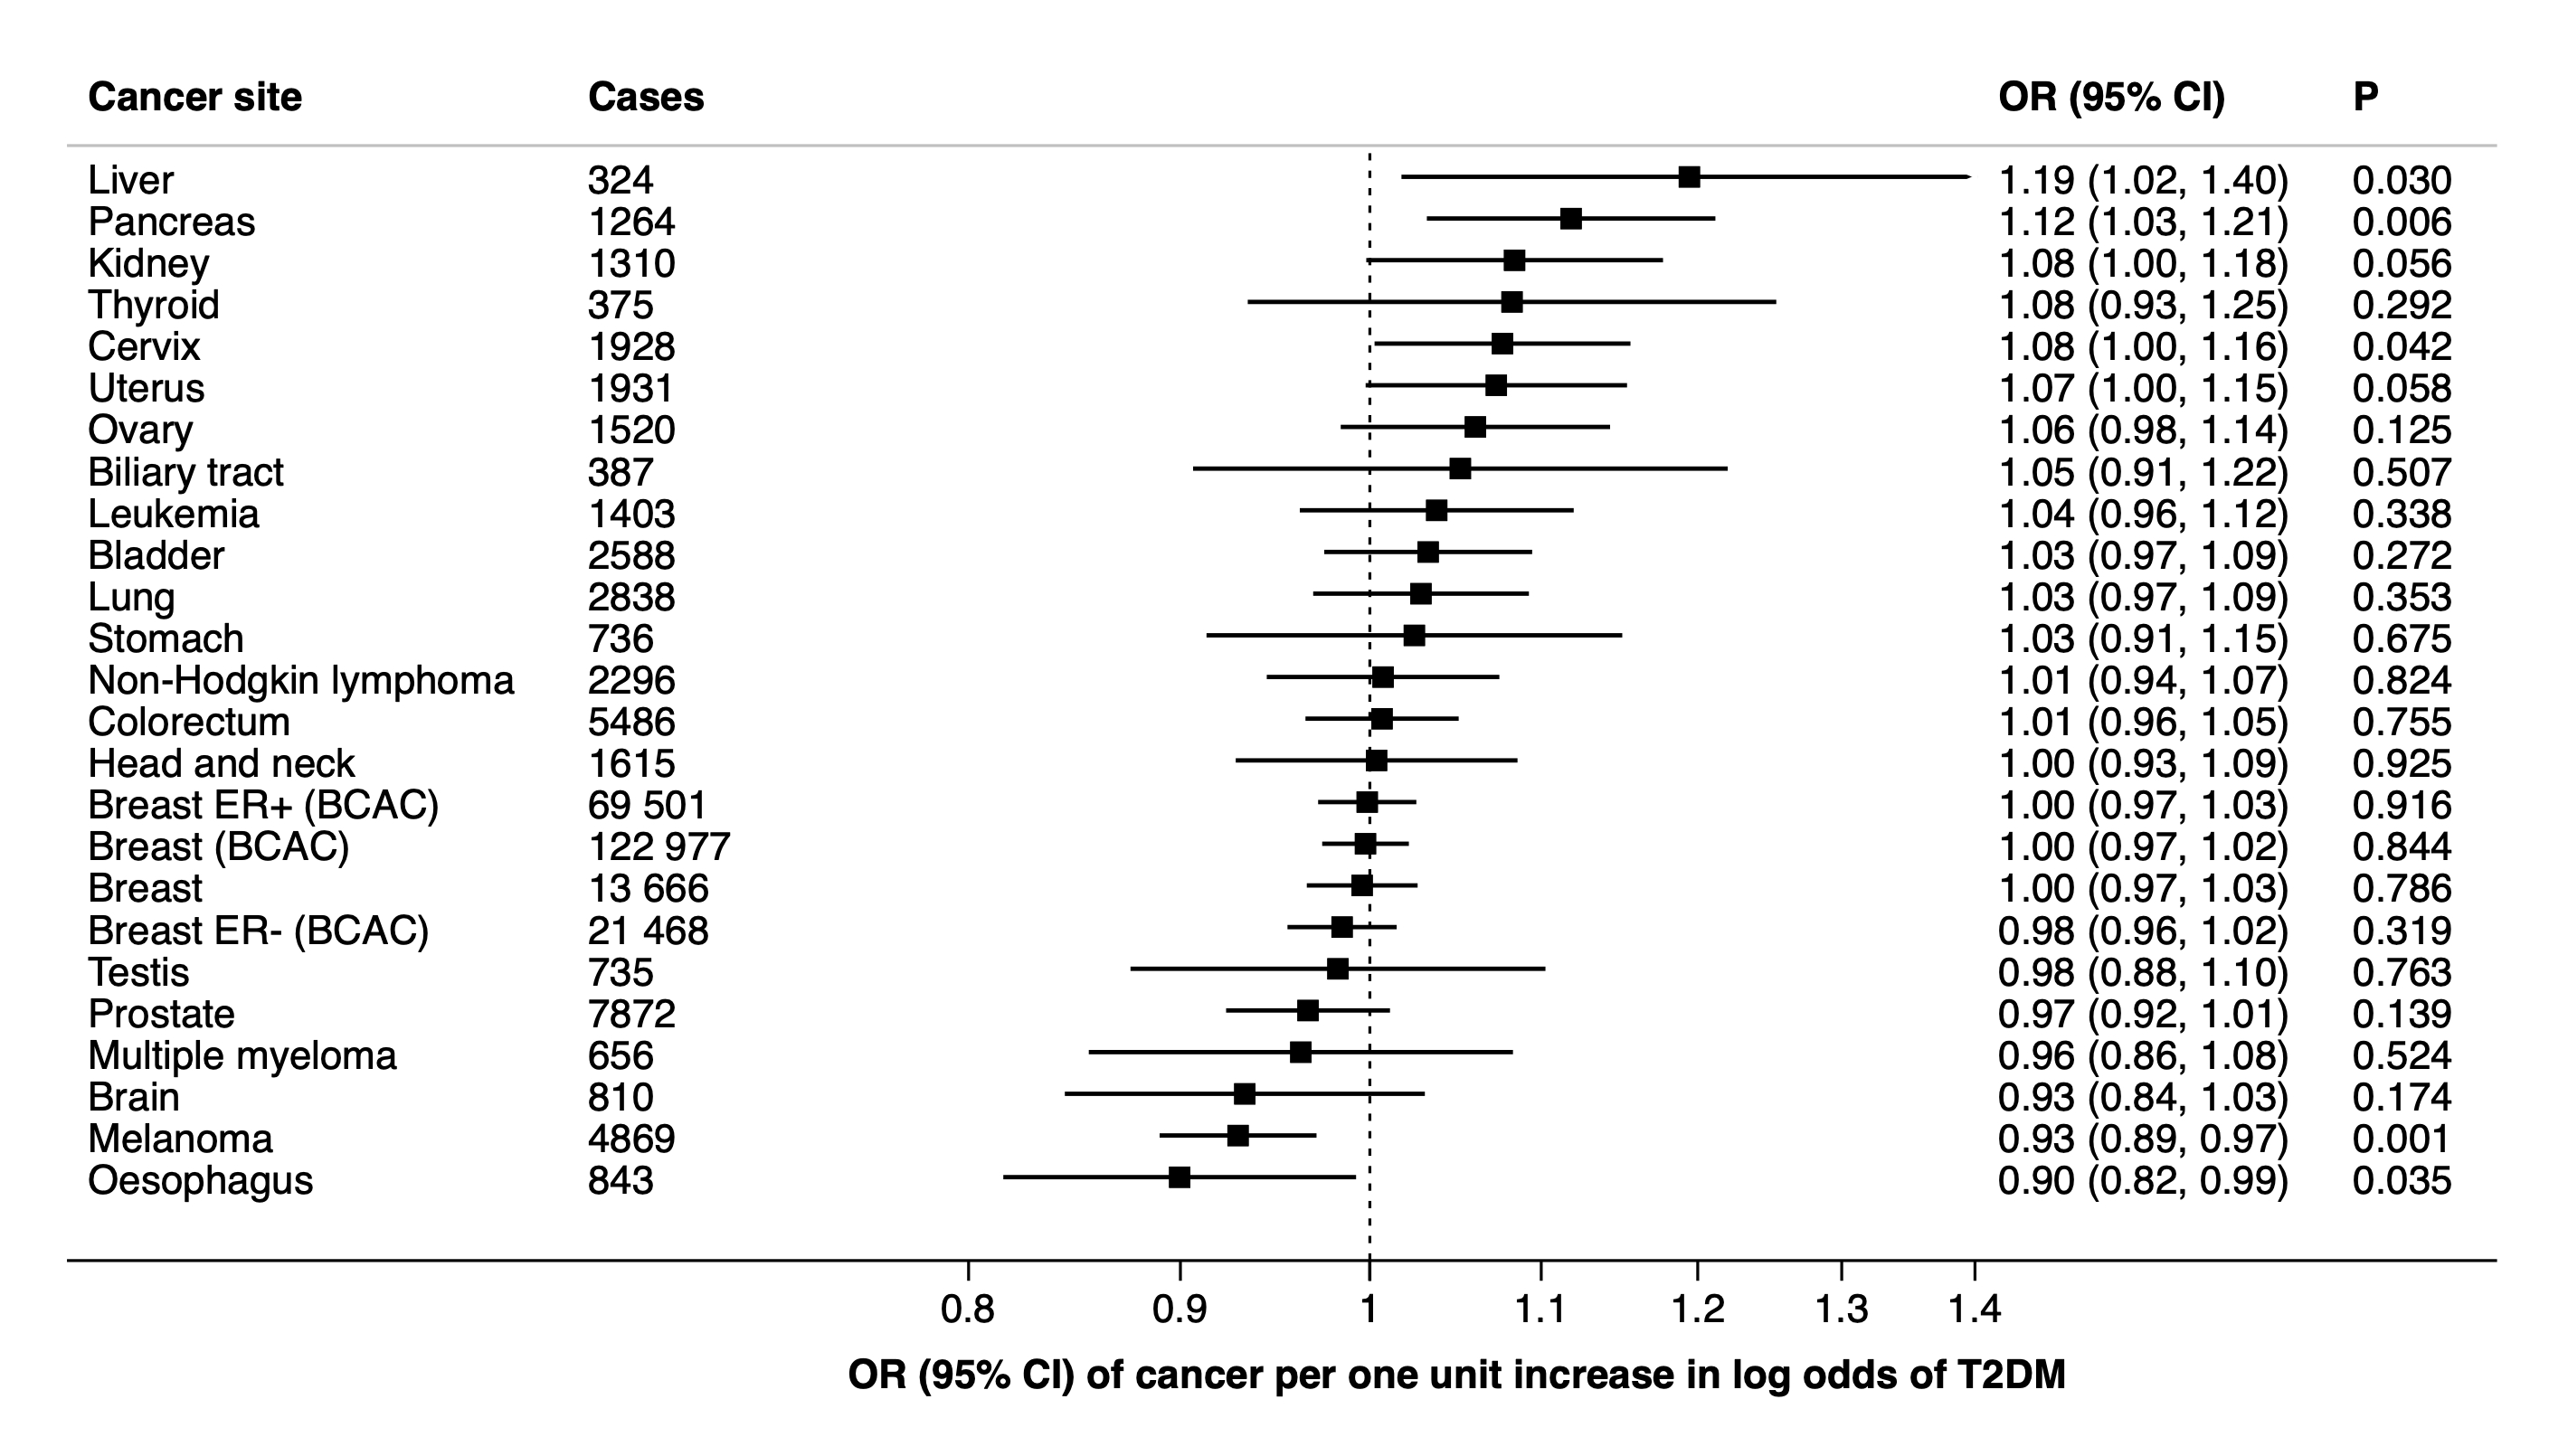
**

CI indicates confidence interval; OR, odds ratio; T2DM, type 2 diabetes mellitus.

The estimation was based on inverse-variance weighted model.

**Supplementary Figure** **3. Associations of pancreatic cancer and T2DM risk**

**
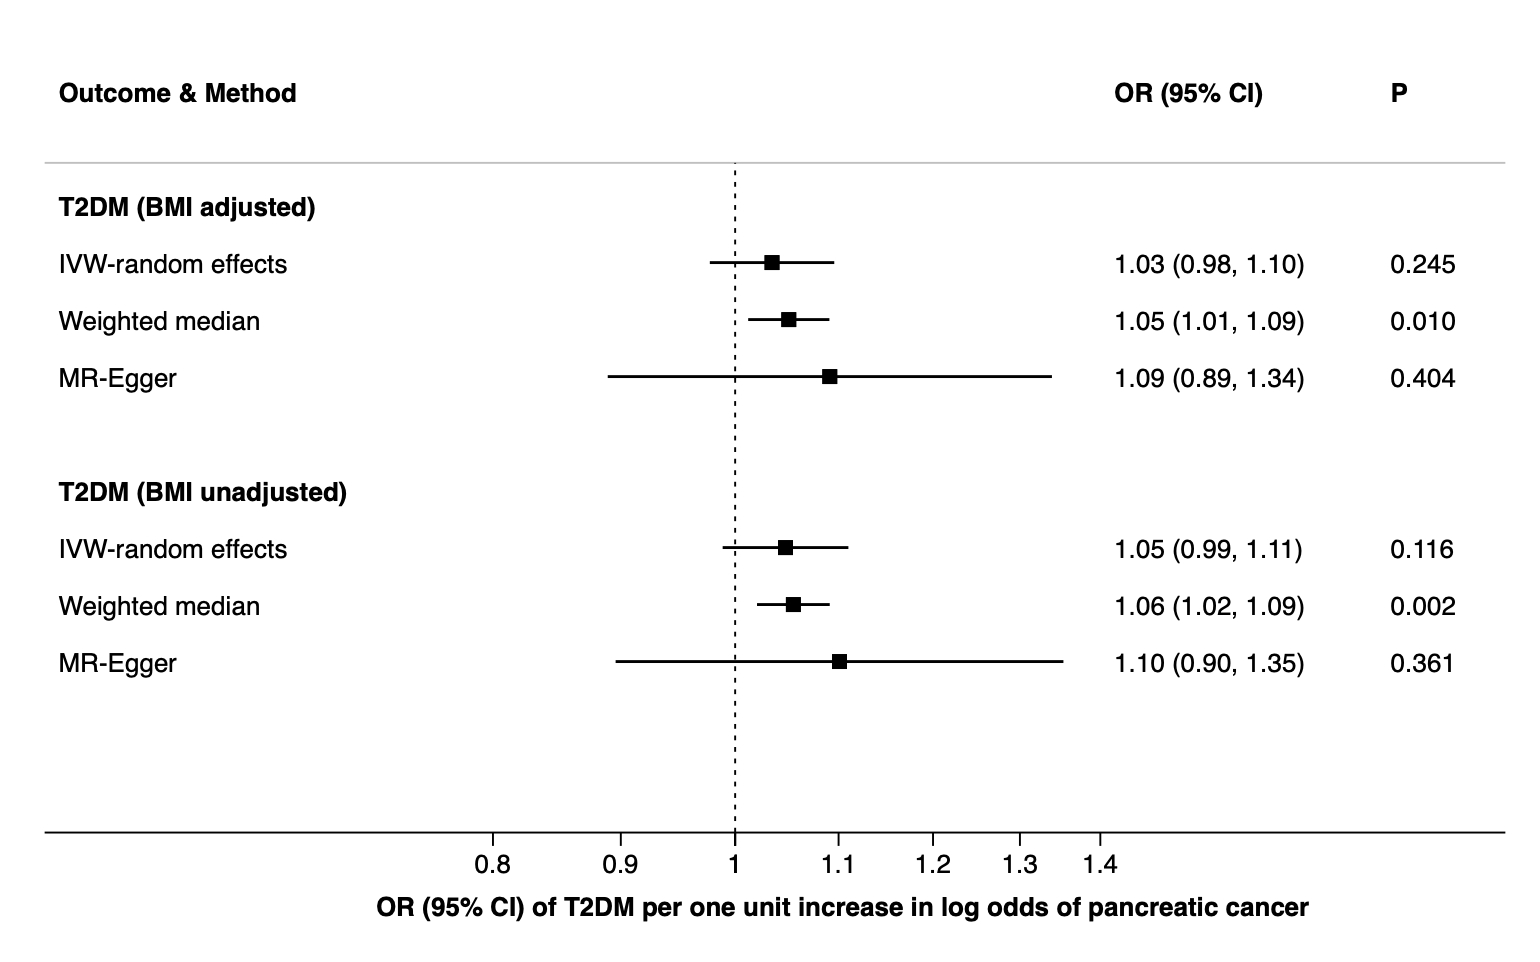
**

CI indicates confidence interval; BMI, body mass index; OR, odds ratio; T2DM, type 2 diabetes mellitus.

**Supplementary Figure** **4. Associations between type 2 diabetes mellitus and cancers after body mass index adjustment in UK Biobank**

**
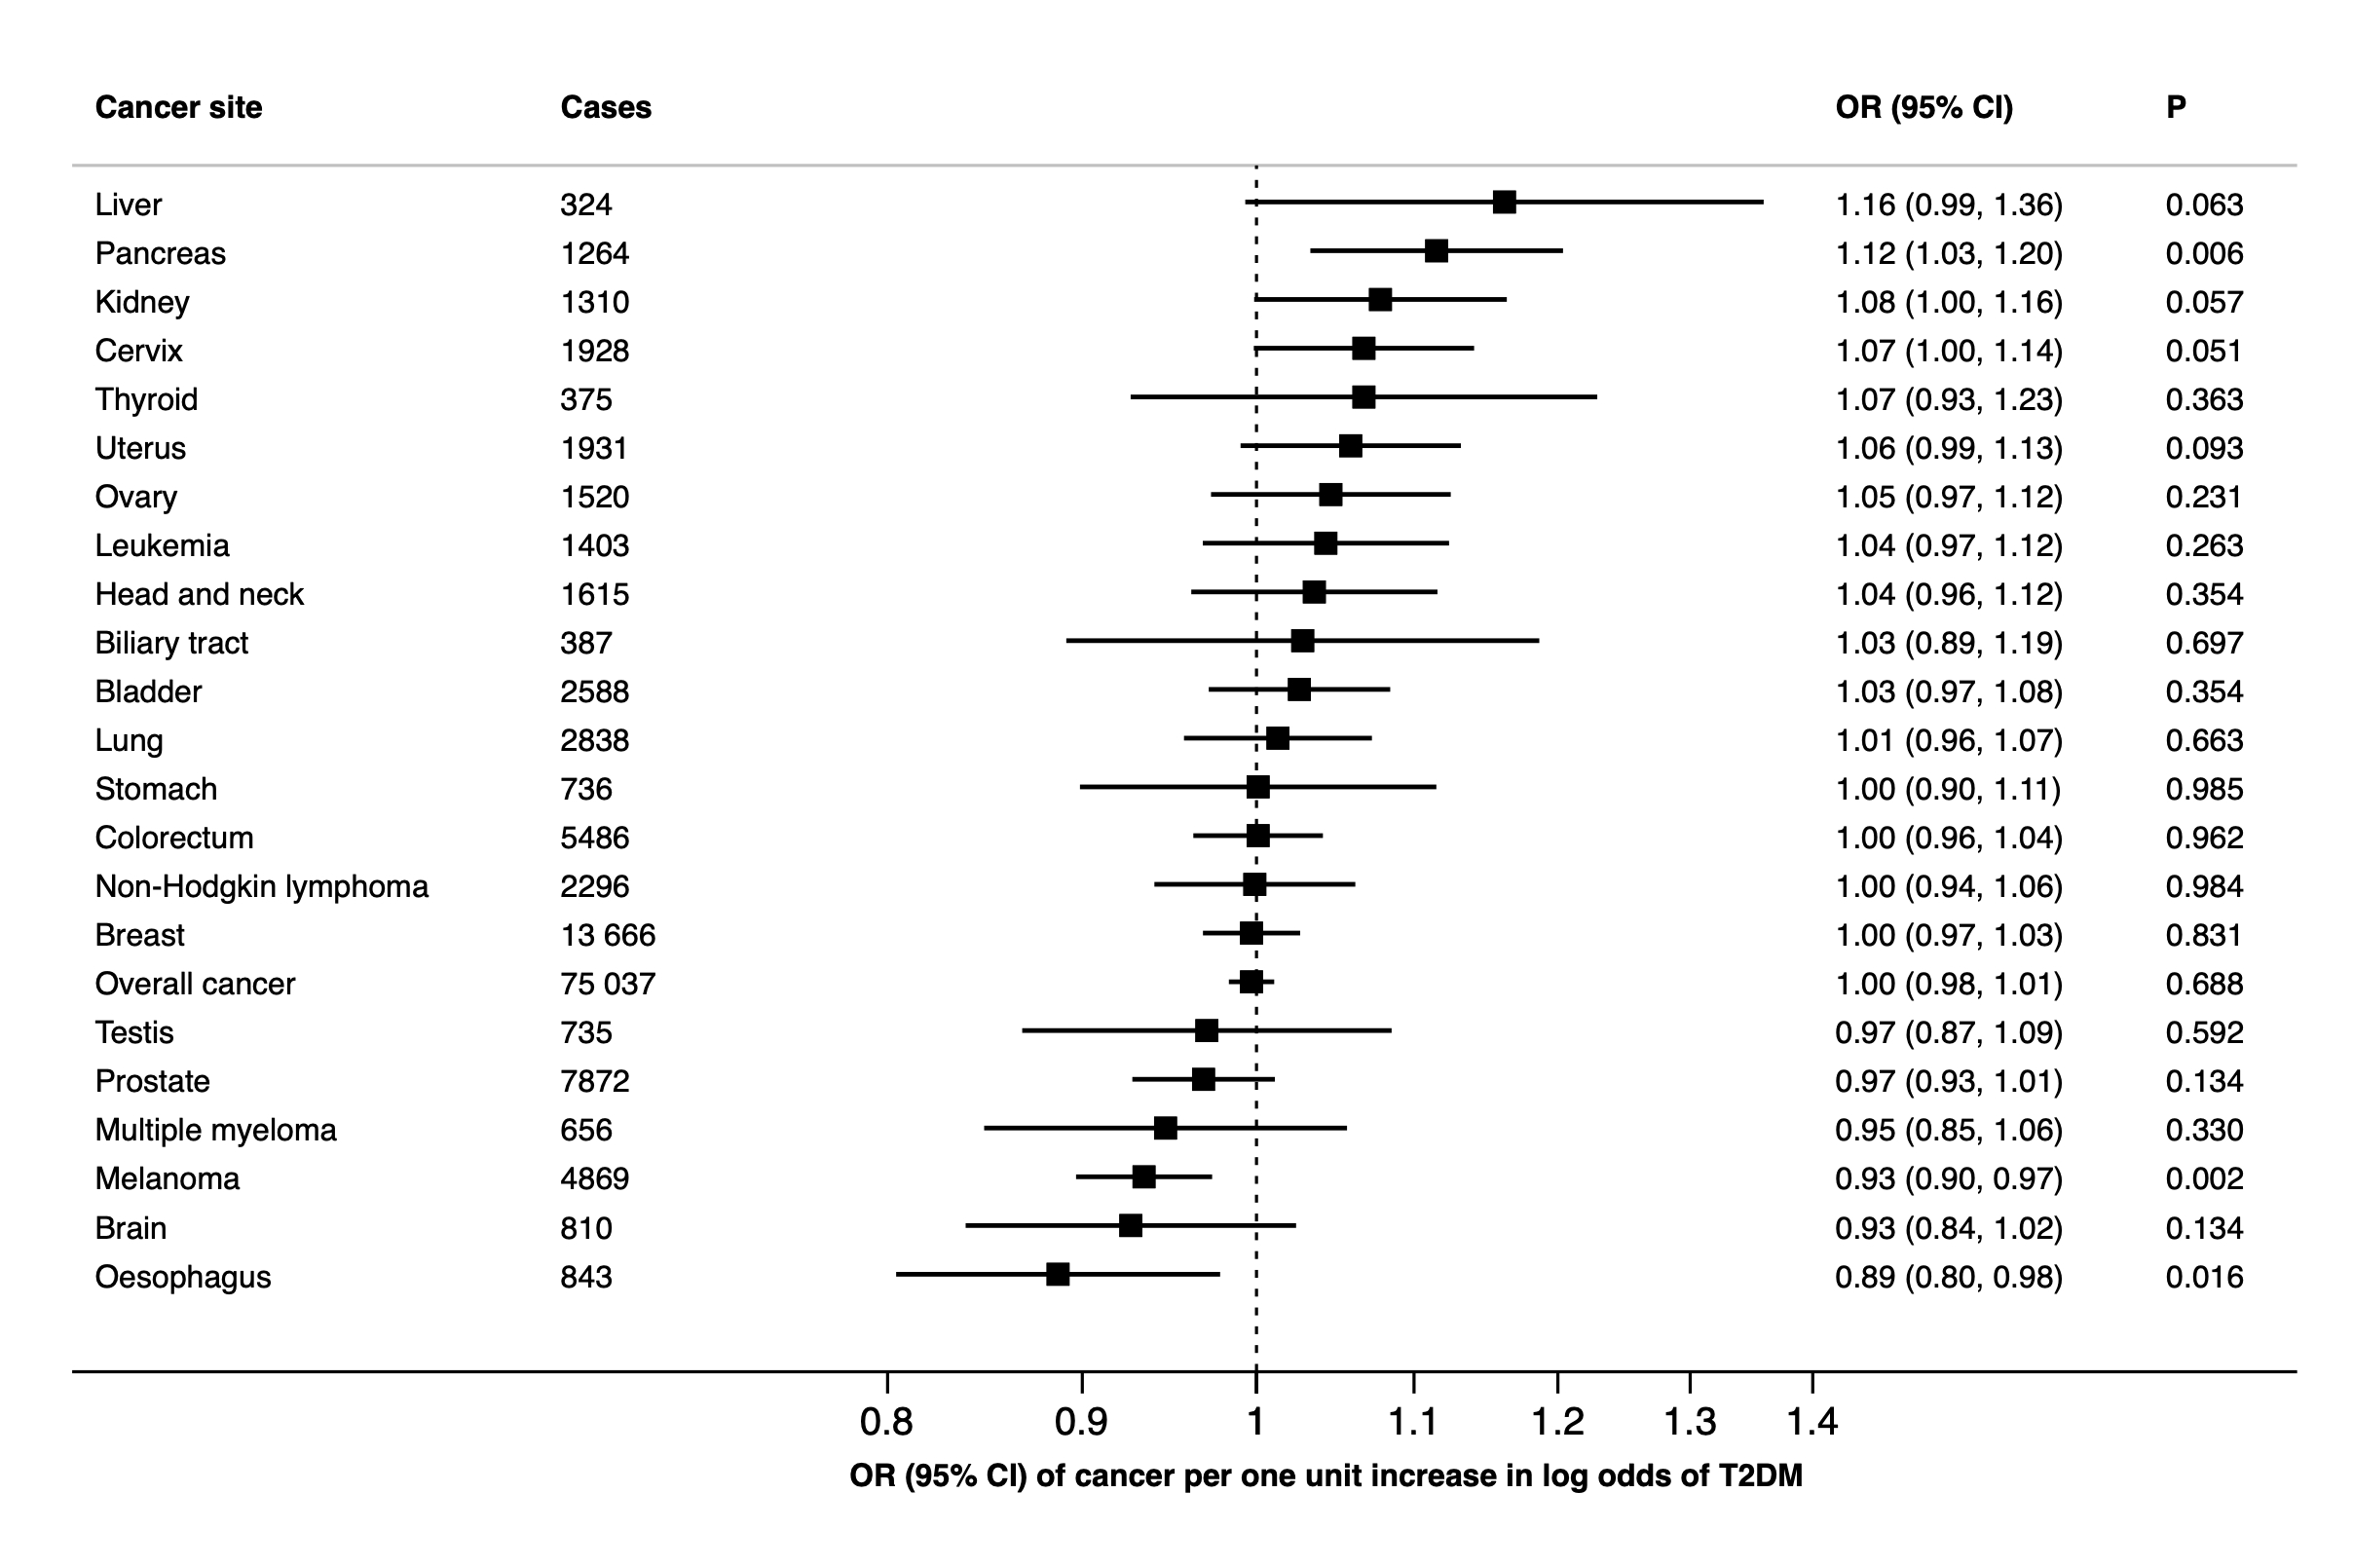
**

CI indicates confidence interval; OR, odds ratio;

Five SNPs were not available in the body mass index (BMI) dataset, leaving 394 SNPs in the BMI-adjusted estimates for T2DM.

**Supplementary Figure** **5. Associations of fasting glucose and insulin levels with overall cancer risk**

**
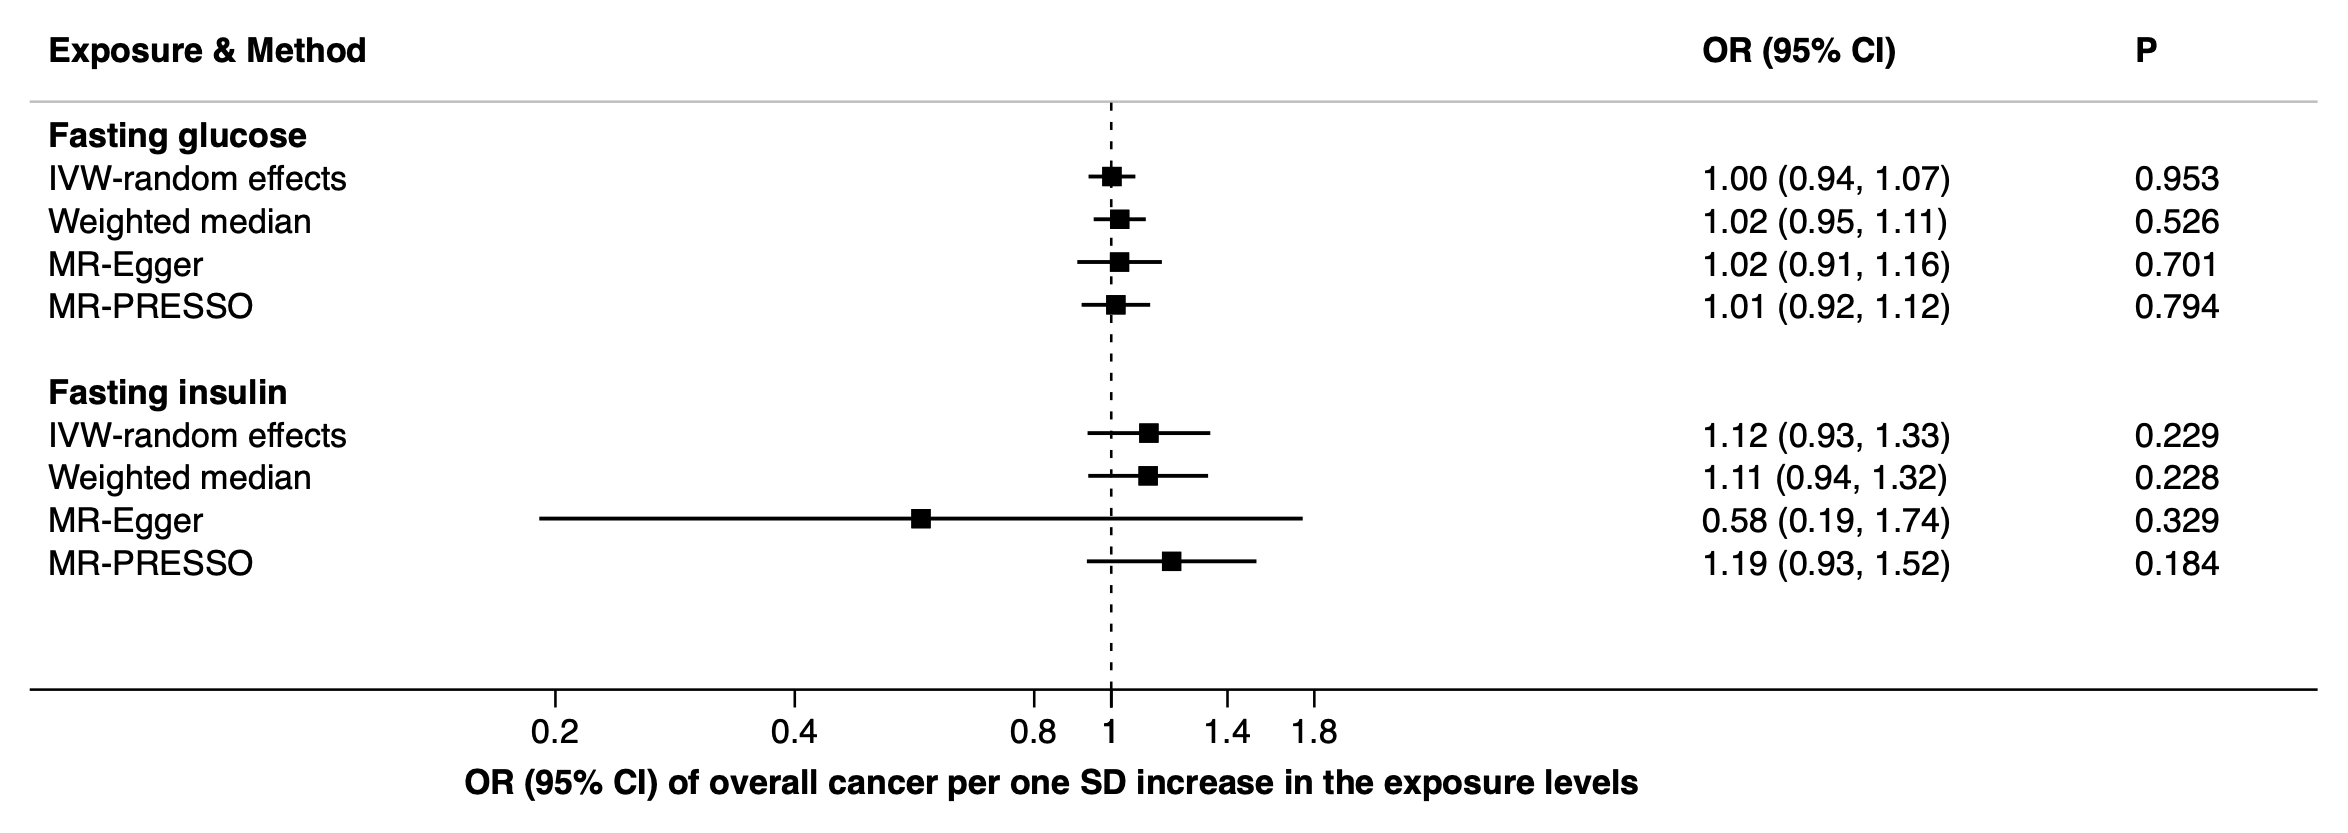
**

CI indicates confidence interval; MR-PRESSO, Mendelian randomization-pleiotropy residual sum and outlier; IVW, inverse-variance weighted; OR, odds ratio. Heterogeneity was observed in both analyses. There was not detected pleiotropy in MR-Egger analysis. One and two outliers were detected and corrected in the MR-PRESSO analysis of fasting glucose and fasting insulin, respectively.

**Supplementary Figure** **6. Association between fasting glucose levels and 22-site specific cancers**

**
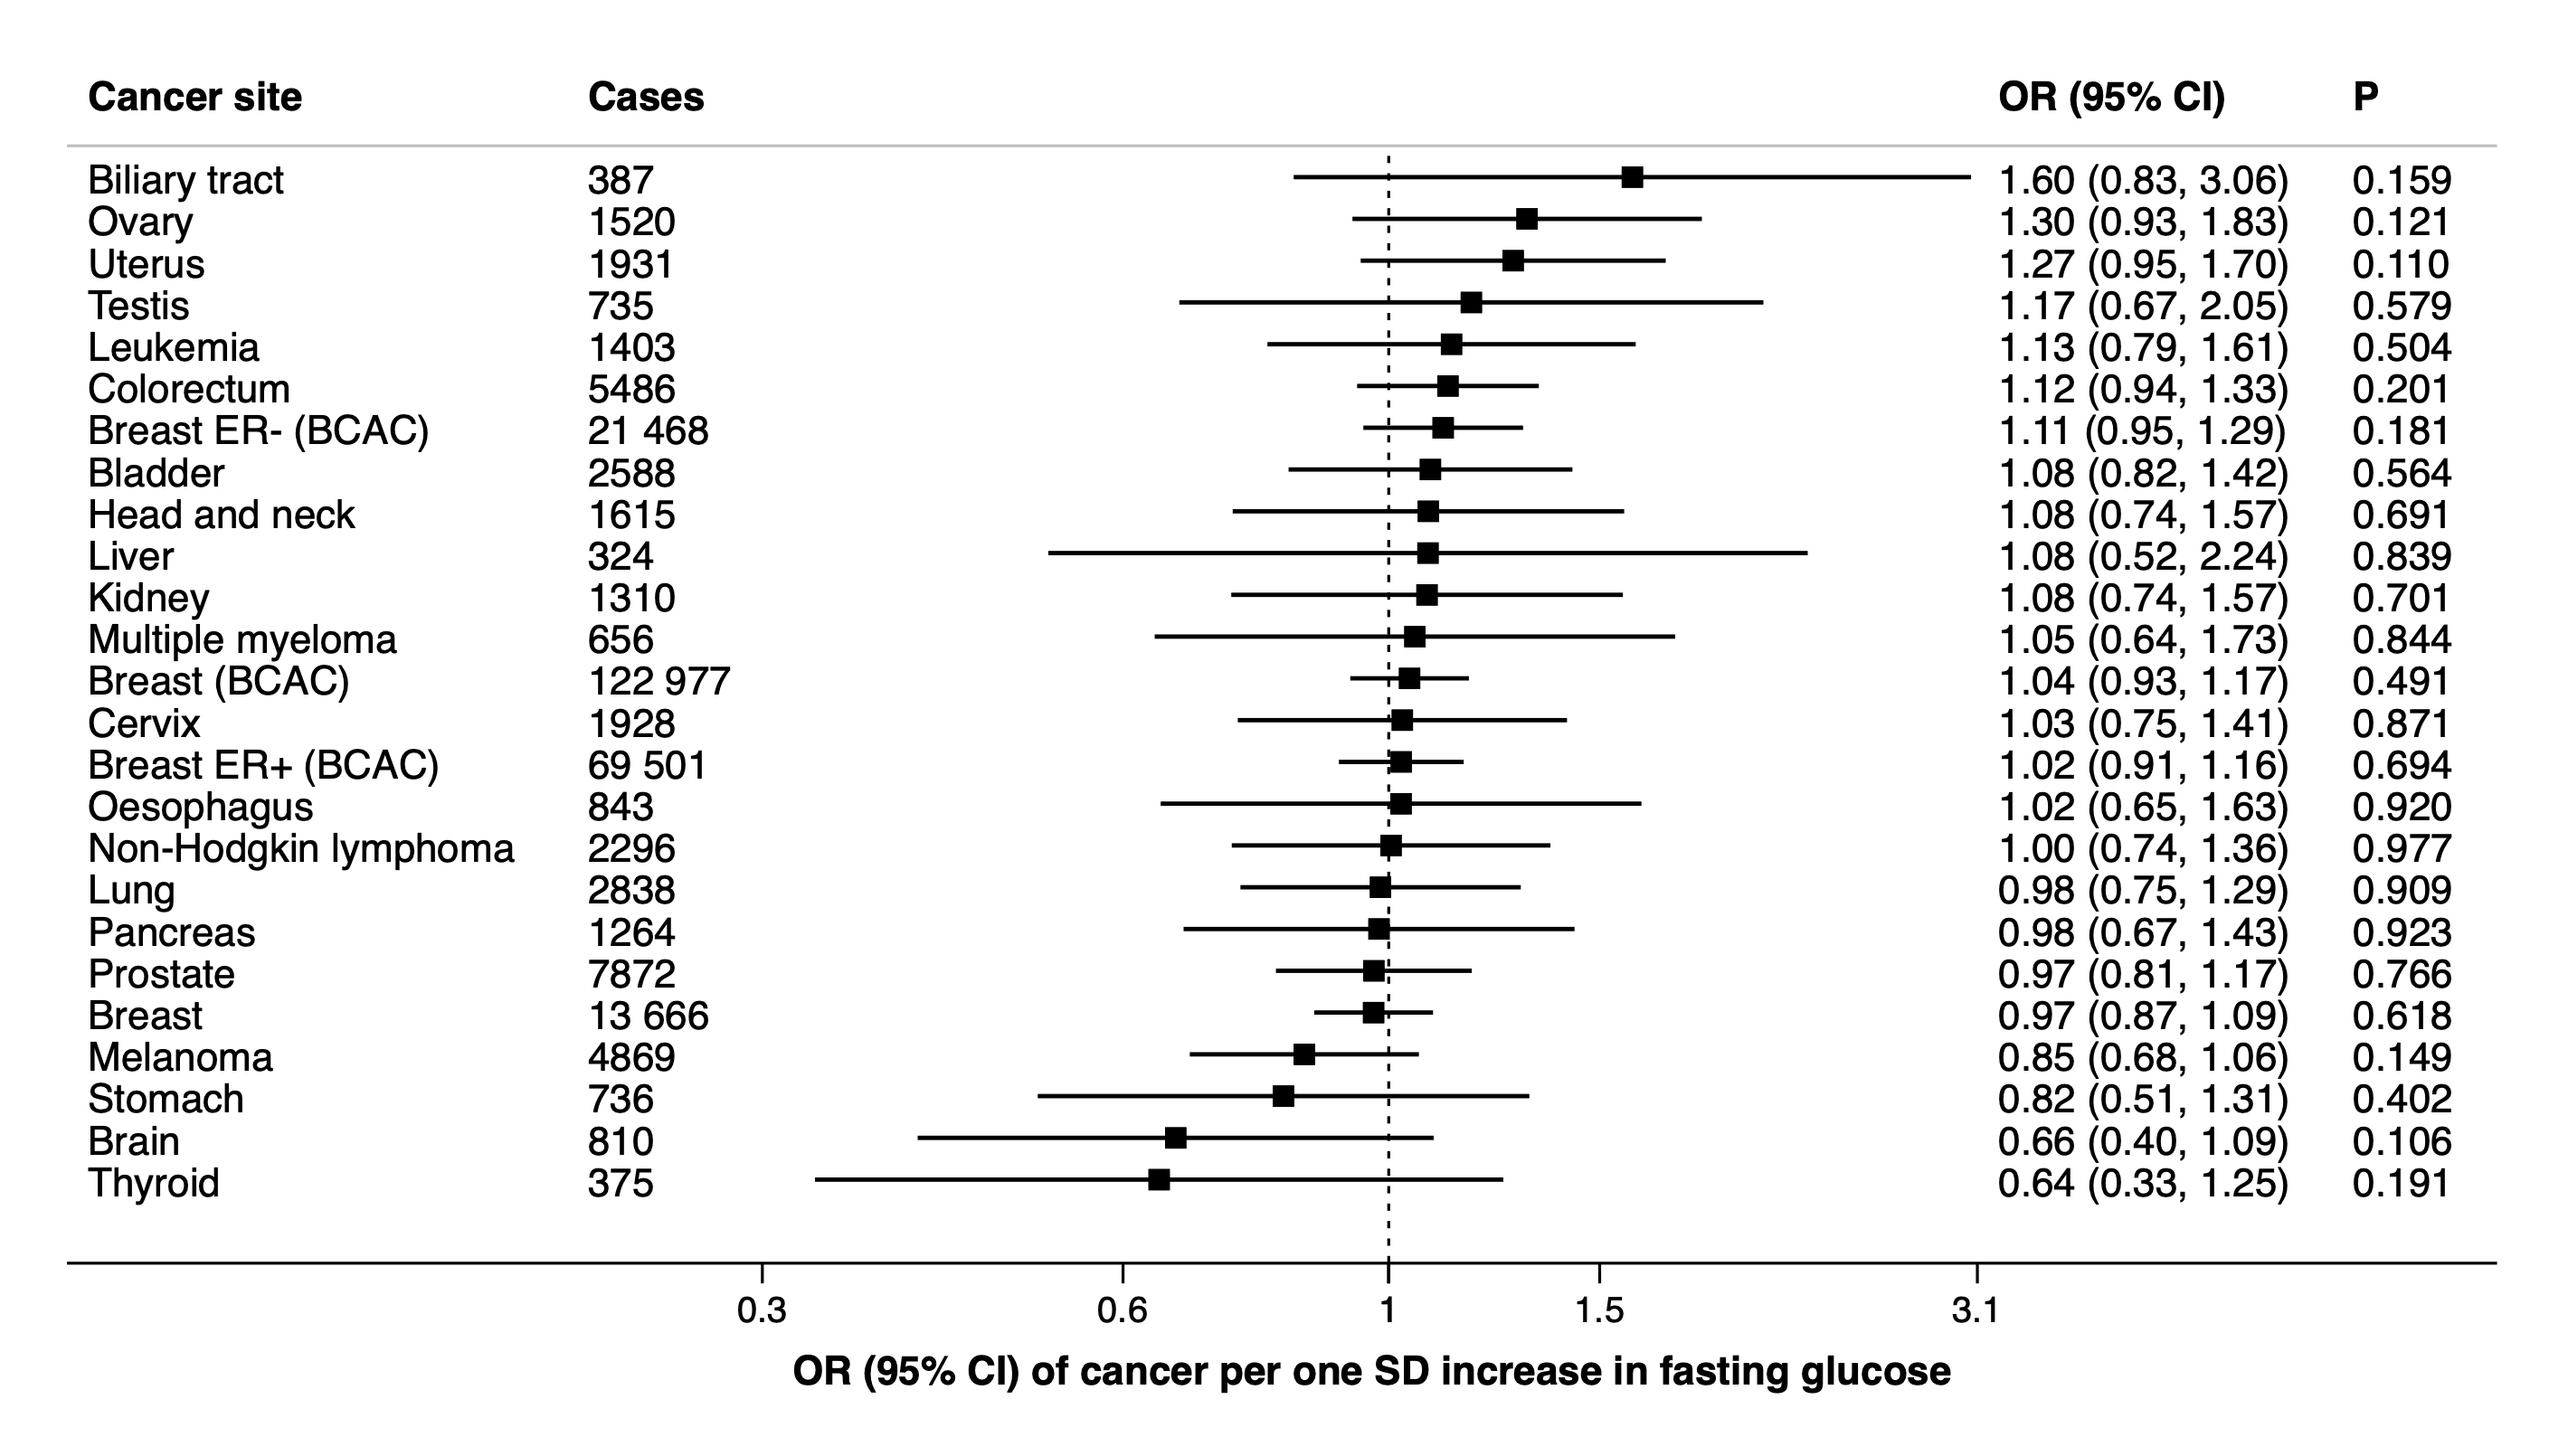
**

CI indicates confidence interval; OR, odds ratio. The estimation was based on inverse-variance weighted model.

**Supplementary Figure** **7. Association between fasting insulin levels and 22-site specific cancers**

**
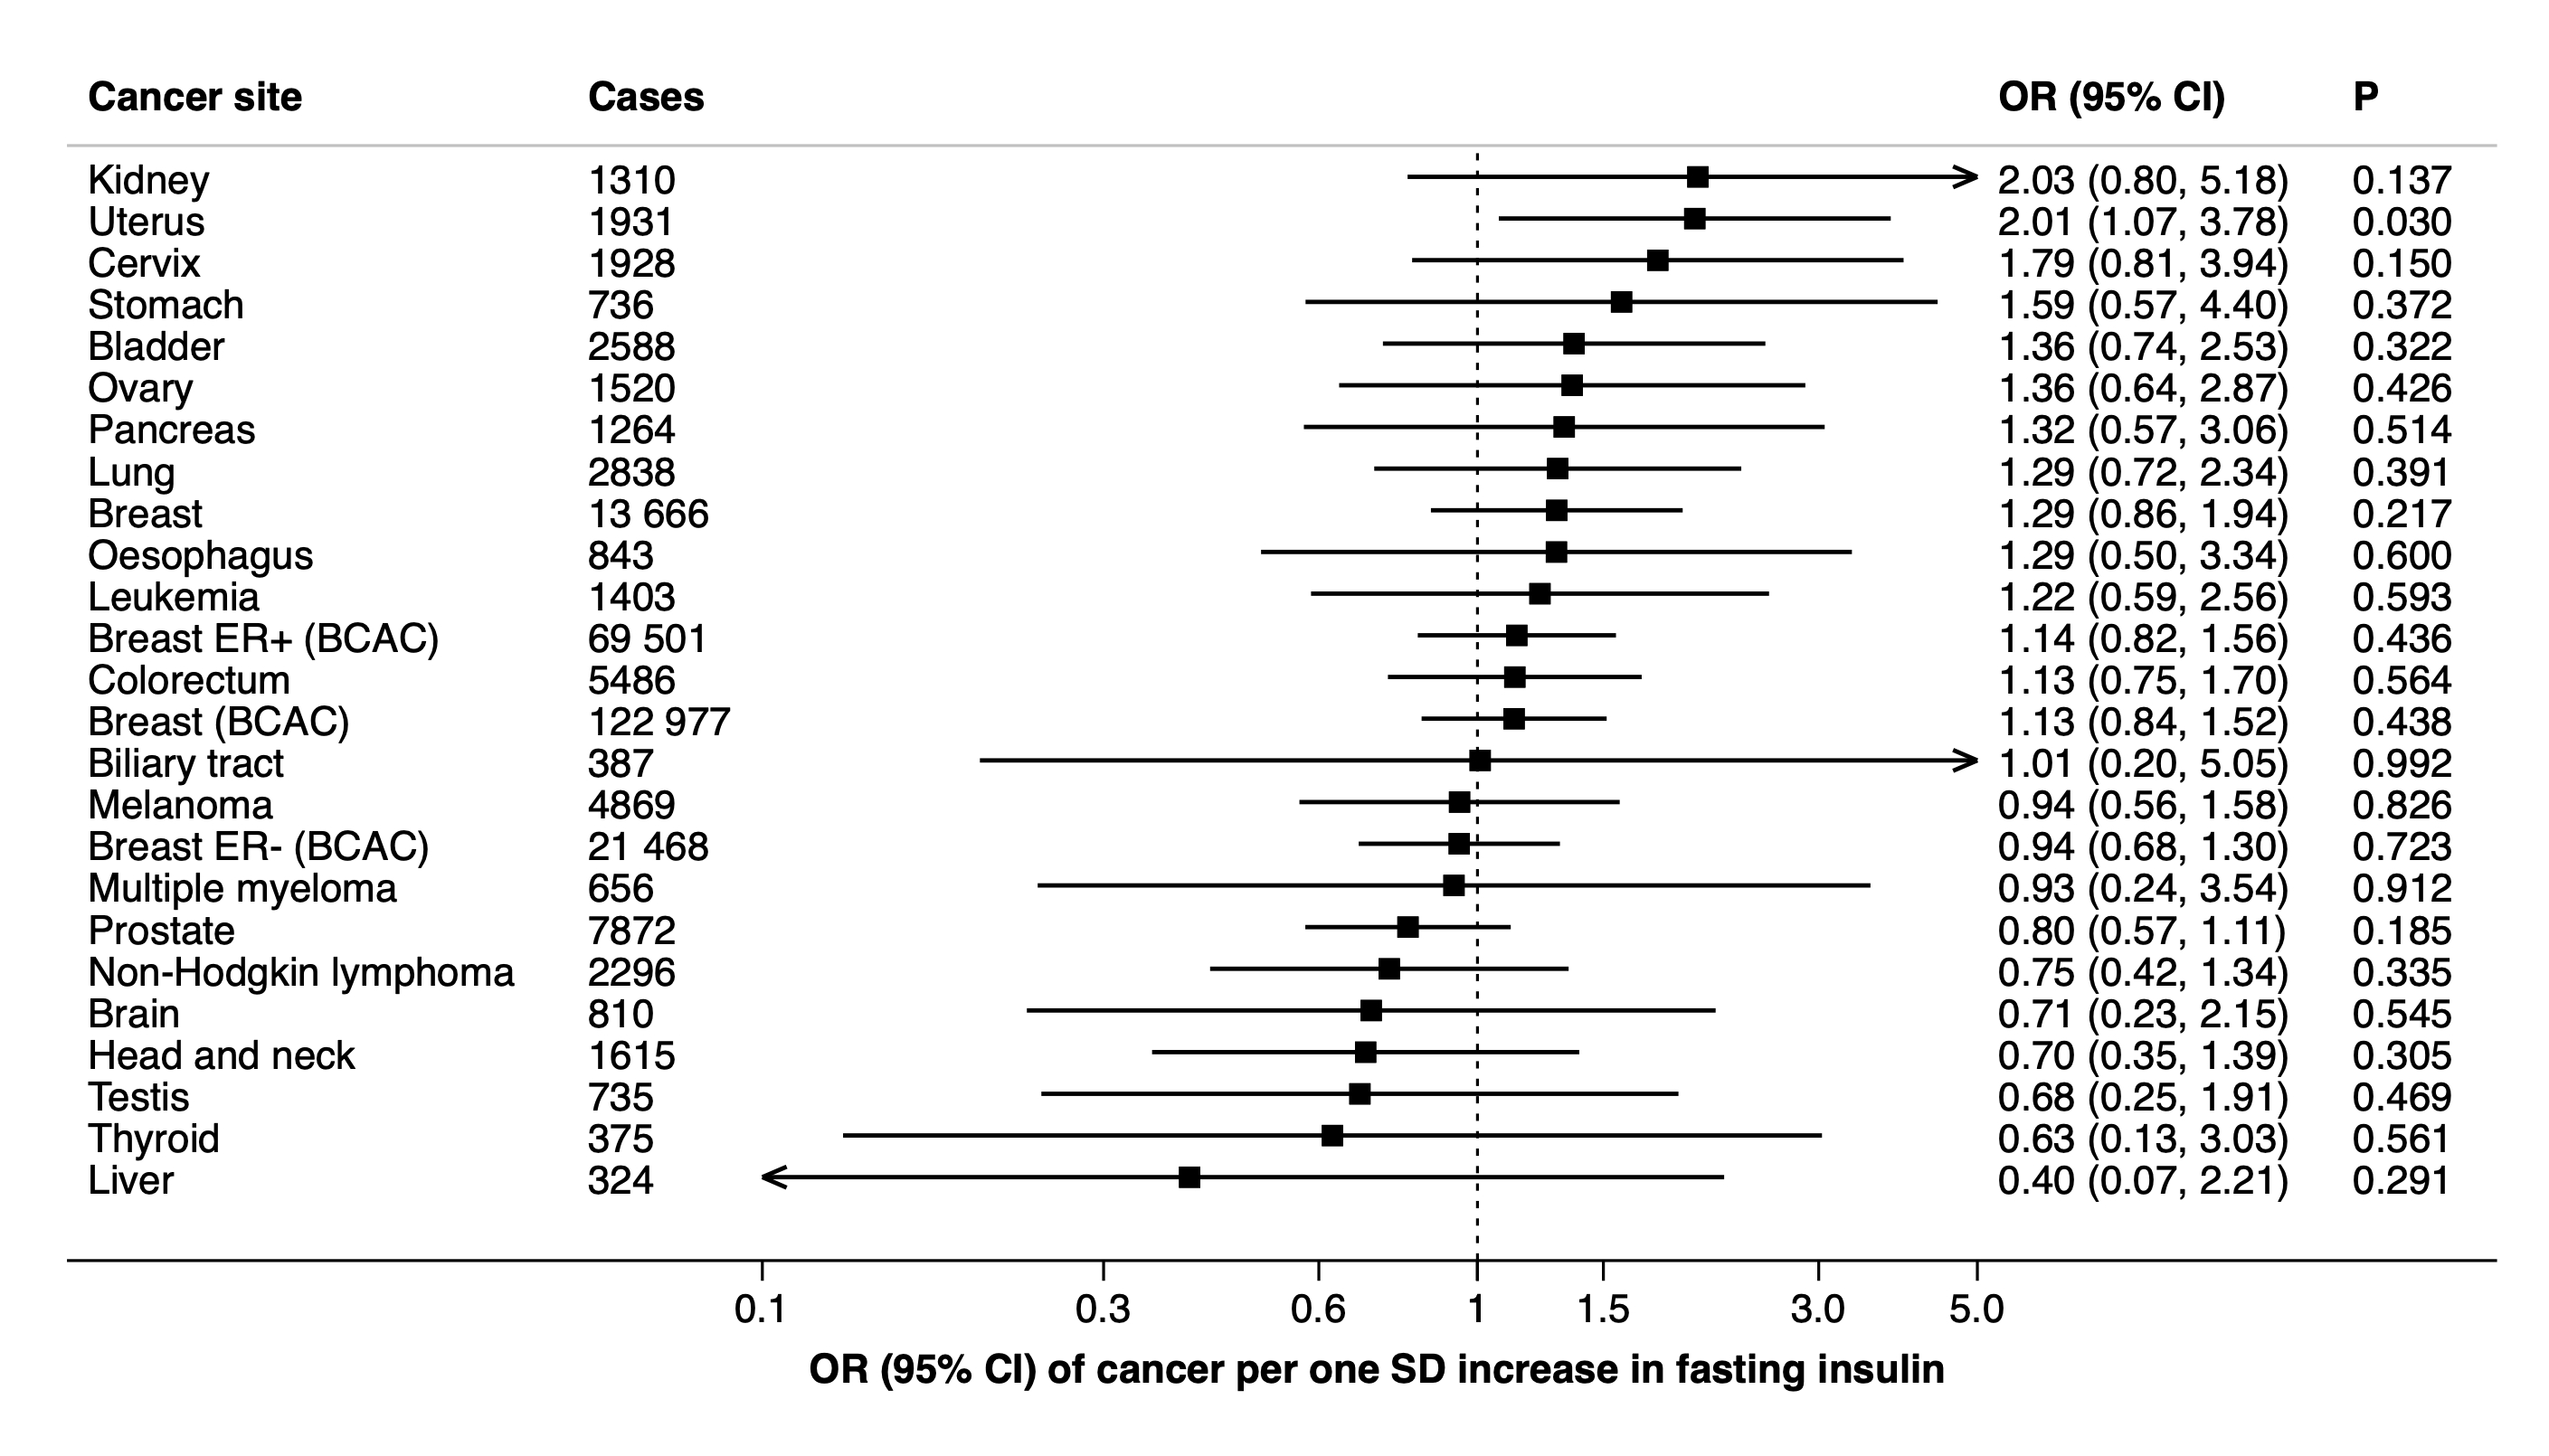
**

CI indicates confidence interval; OR, odds ratio. The estimation was based on inverse-variance weighted model.

**Supplementary Figure** **8. Meta-analysis of effects of fasting glucose on certain site-specific cancers**

**
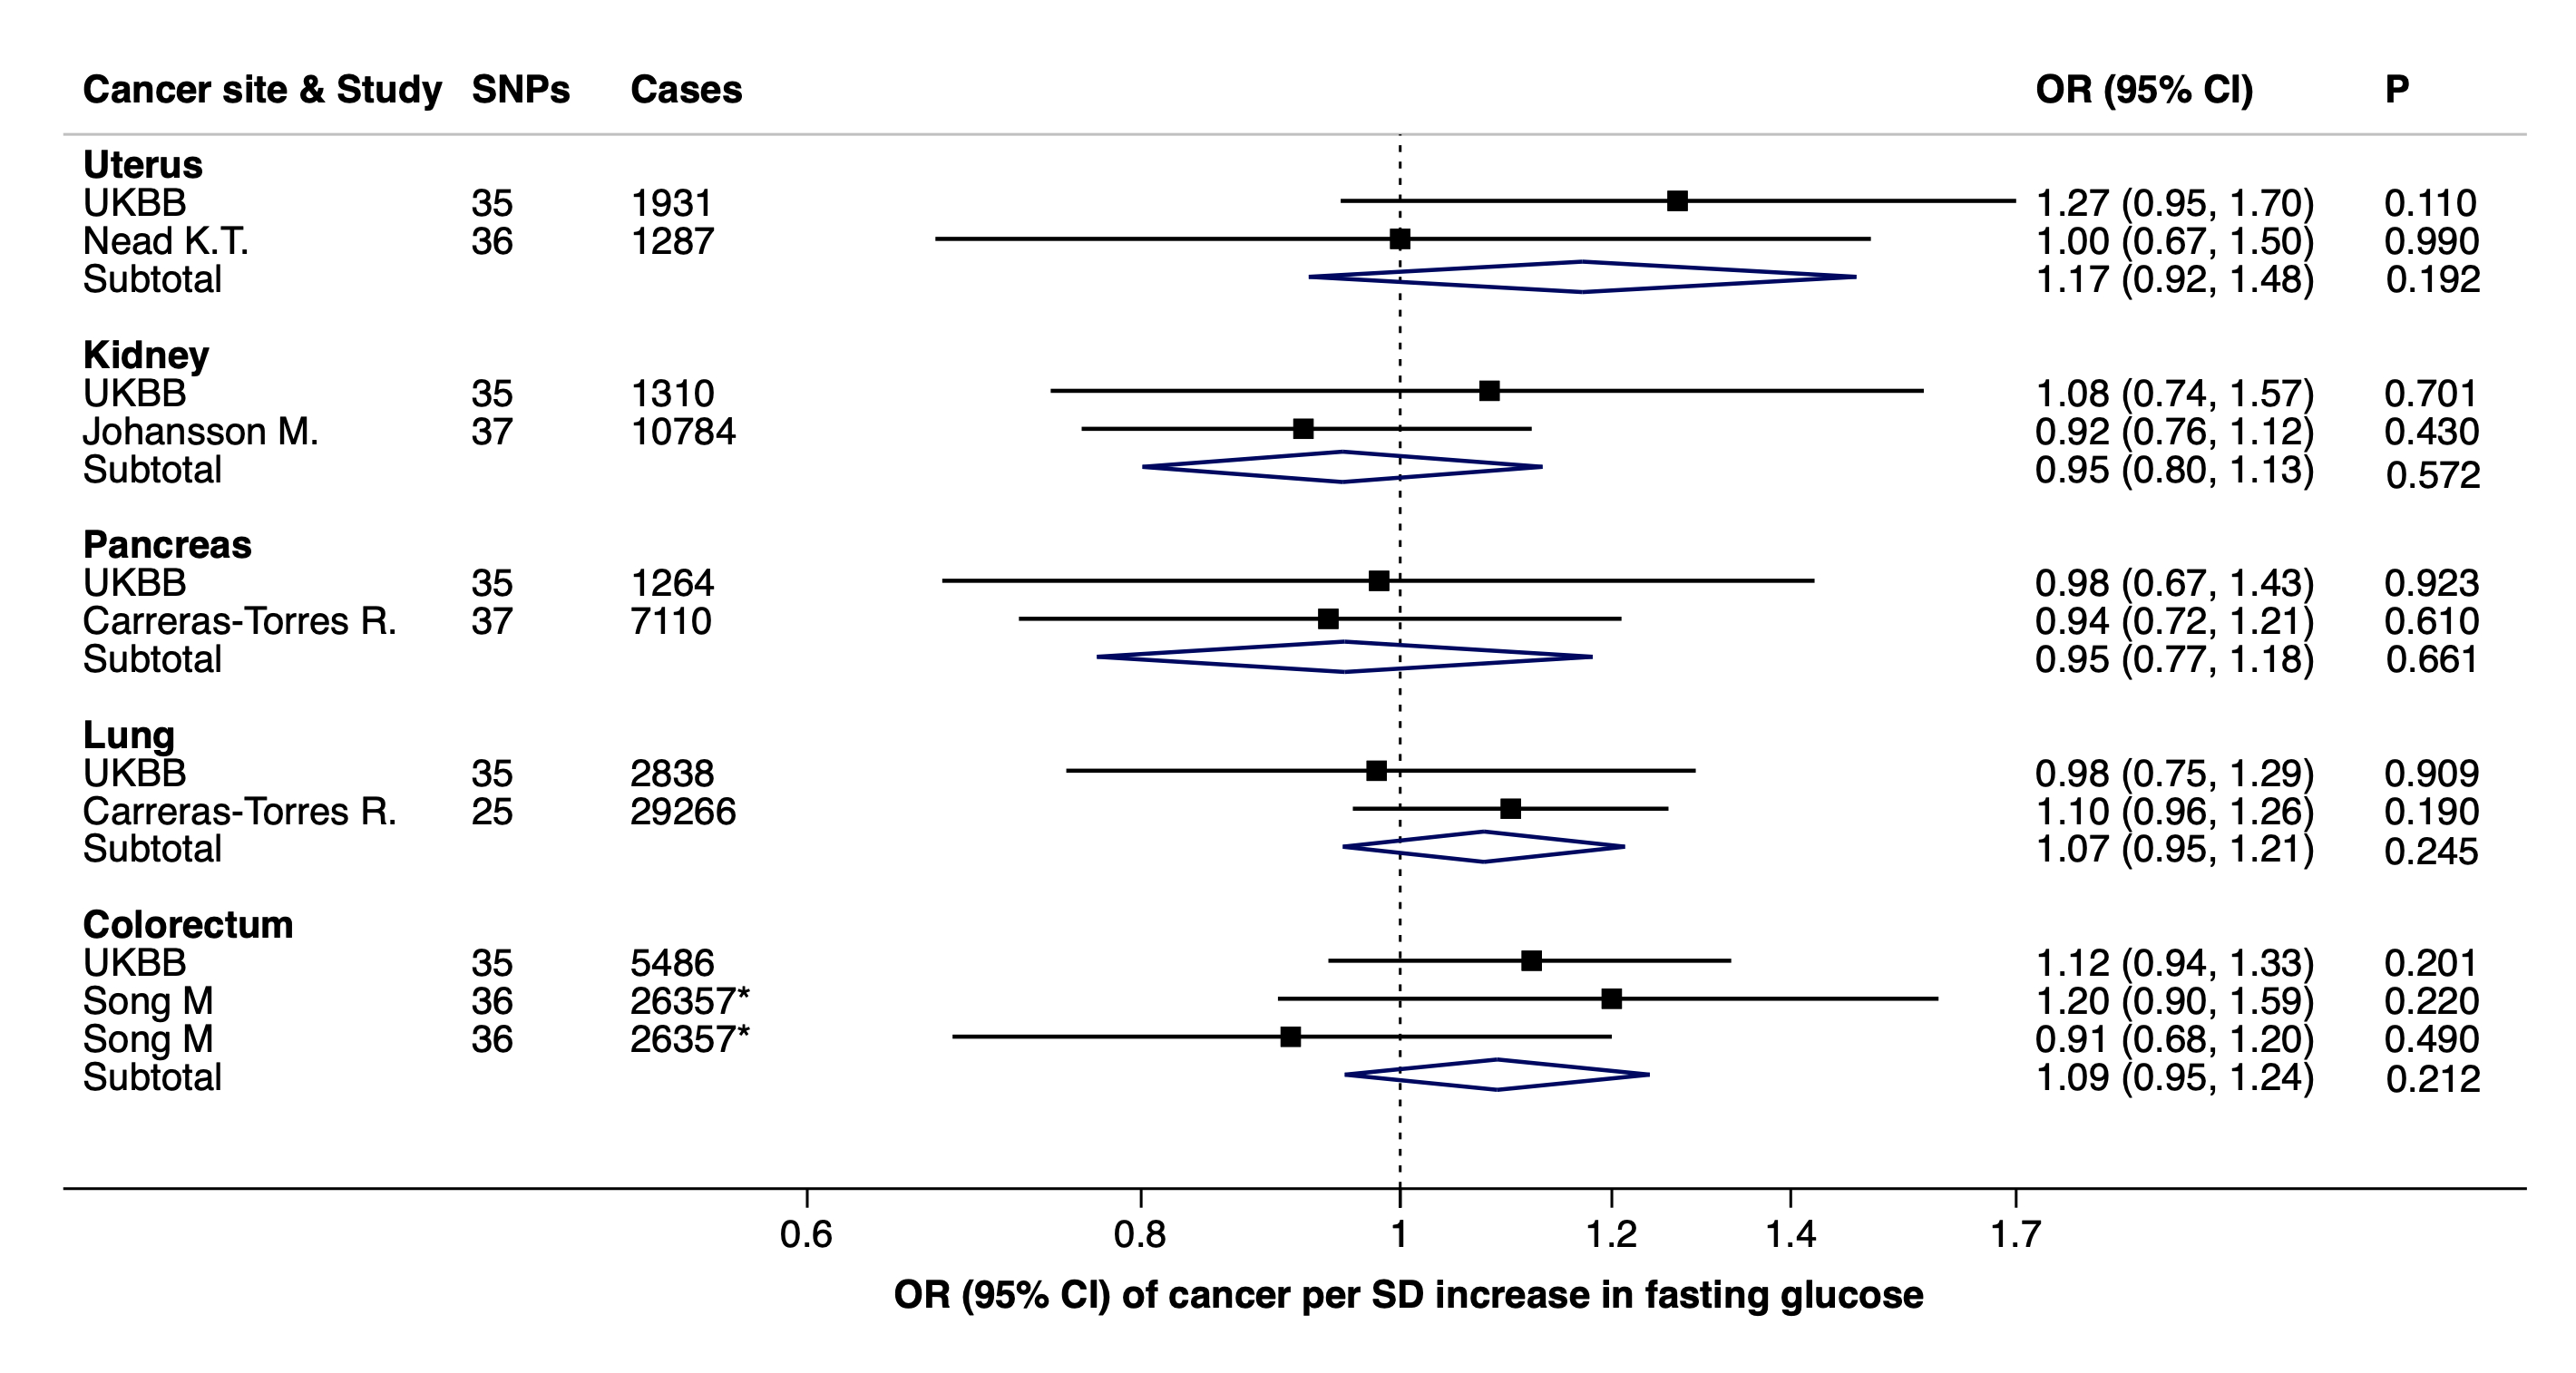
**

CI indicates confidence interval; OR, odds ratio; SD, standard deviation; UKBB, UK Biobank.

* Effect size in Song M study was estimated in men and women separately.

**Supplementary Figure** **9. Meta-analysis of effects of fasting insulin on certain site-specific cancers**

**
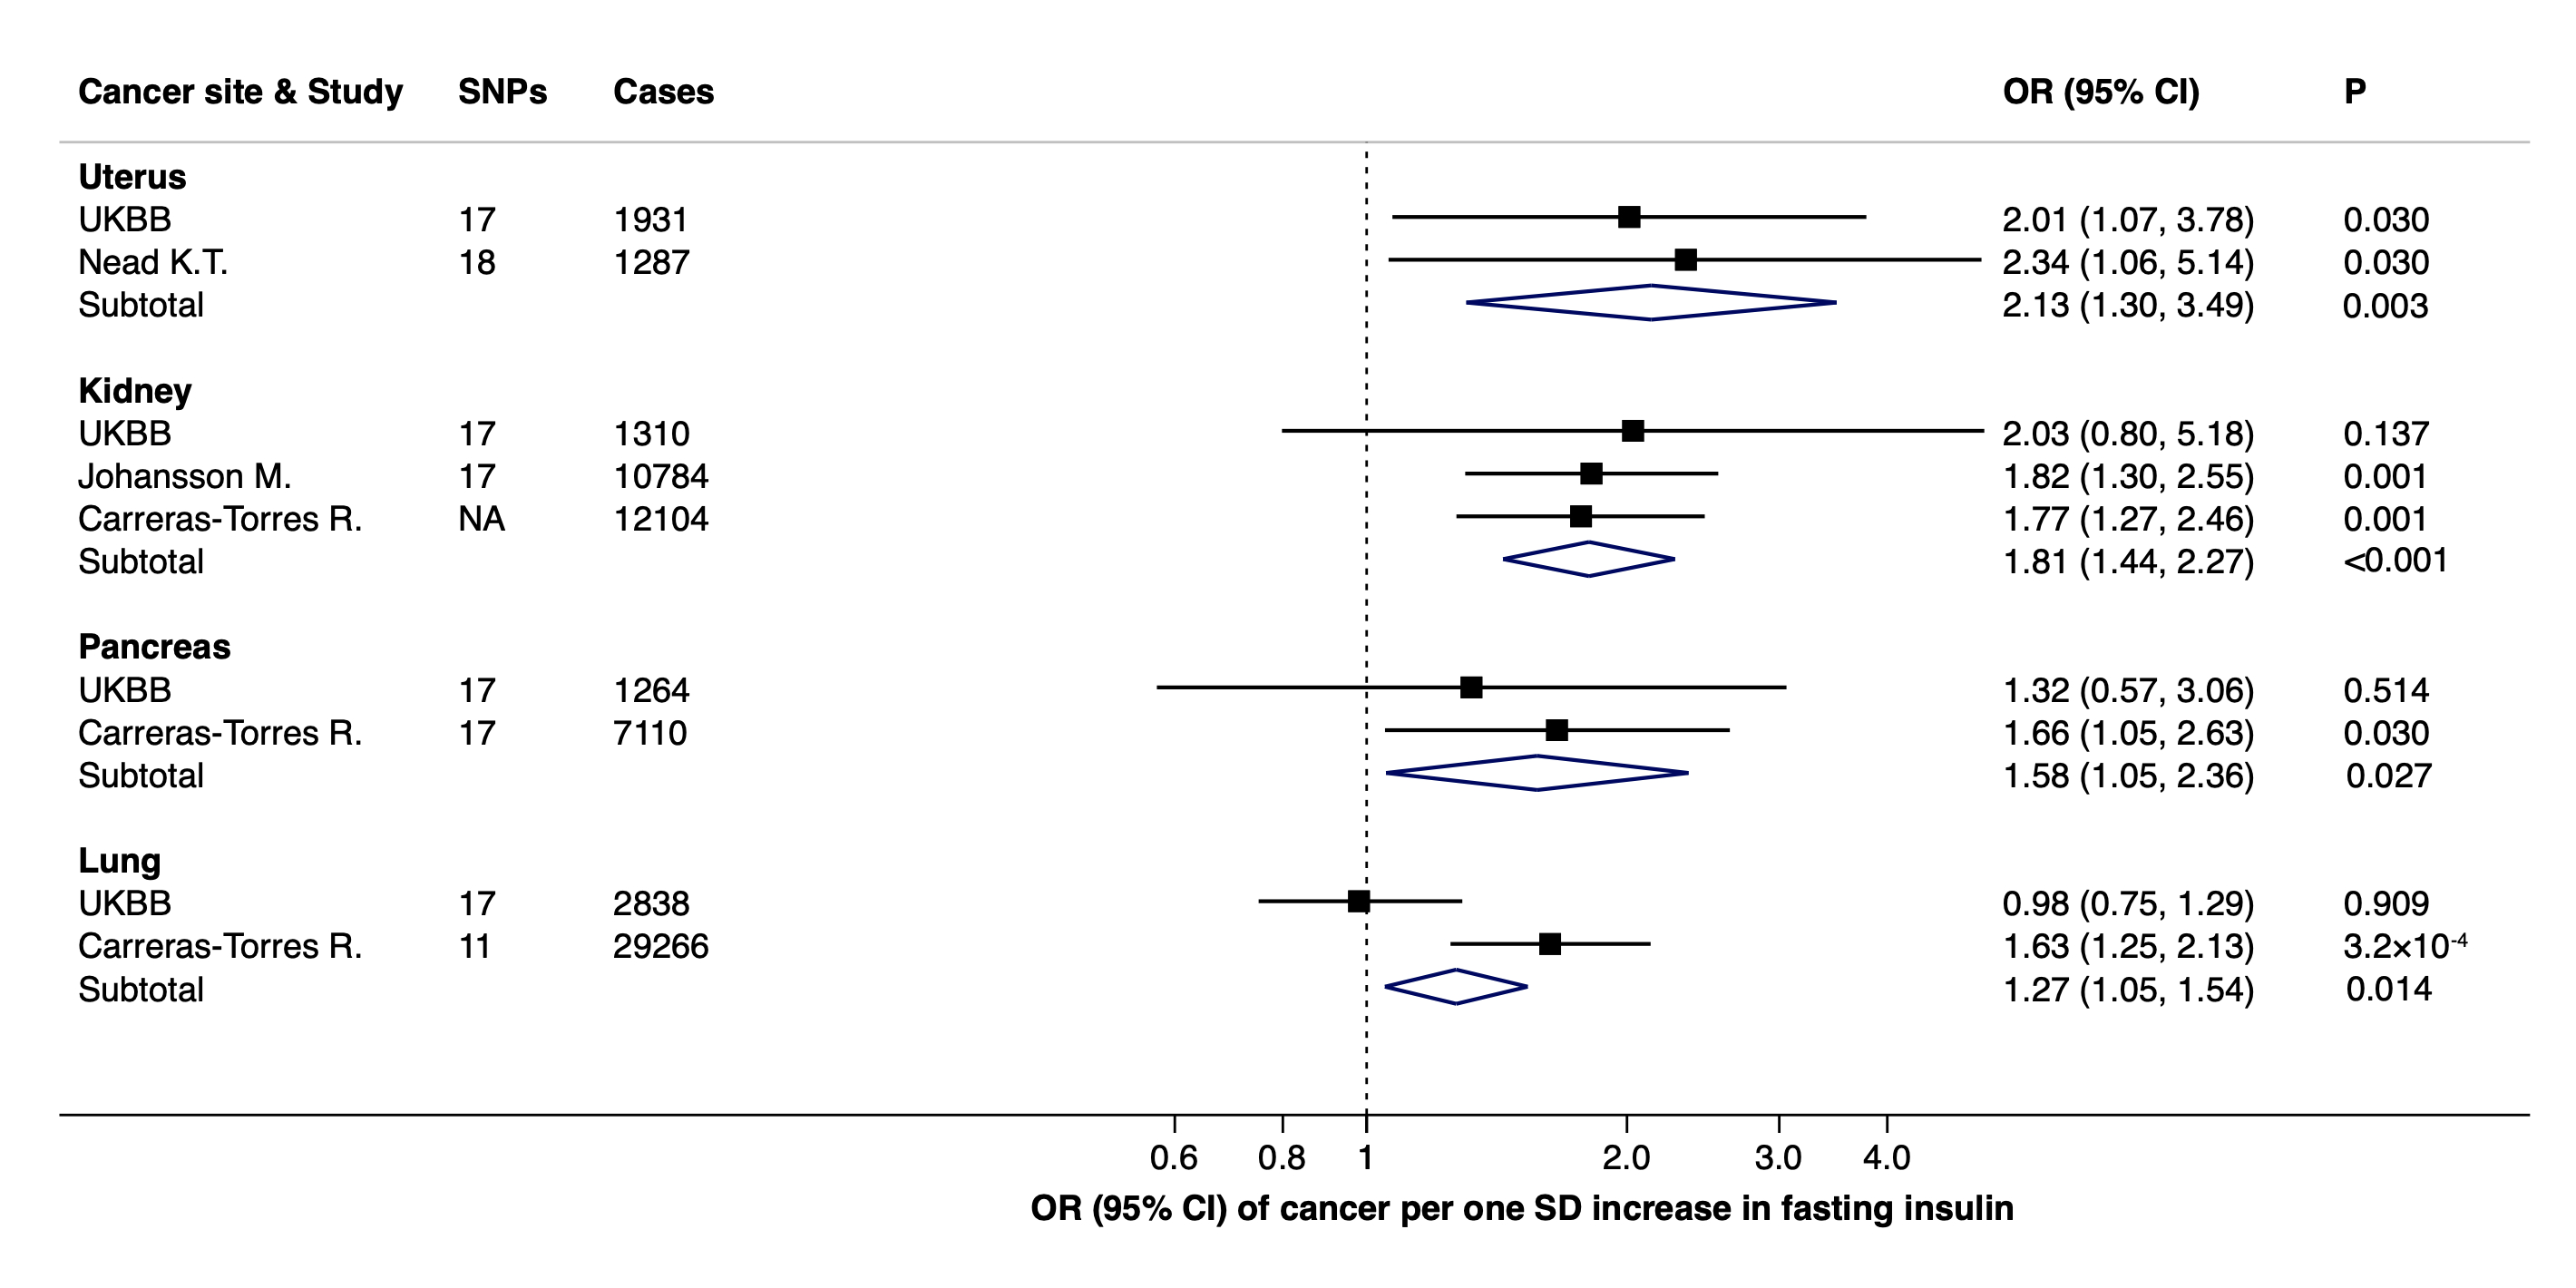
**

CI indicates confidence interval; OR, odds ratio; SD, standard deviation; UKBB, UK Biobank.
